# Supplementary material for: Novel N-Substituted Amino Acid Hydrazone-Isatin Derivatives: Synthesis, Antioxidant Activity, and Anticancer Activity in 2D and 3D Models In Vitro
Source: MDPI journal article supplement (doi:10.3390/ijms22157799), 2021-07-21
Supplement: s1 [file s1]

# Novel *N*-Substituted Amino Acid Hydrazone-Isatin Derivatives: Synthesis, Antioxidant Activity, and Anticancer Activity in 2D and 3D Models *In Vitro*

Ingrida Tumosienė<sup>1</sup>, Ilona Jonuškienė<sup>1</sup>, Kristina Kantminienė<sup>2\*</sup>, Vytautas Mickevičius<sup>1</sup> and Vilma Petrikaitė<sup>3,4,5</sup>

<sup>1</sup> Department of Organic Chemistry, Kaunas University of Technology, Radvilėnų pl. 19, LT-50254 Kaunas, Lithuania; [ingrida.tumosiene@ktu.lt](mailto:ingrida.tumosiene@ktu.lt) (I.T.); [ilona.jonuskiene@ktu.lt](mailto:ilona.jonuskiene@ktu.lt) (I.J.); [vytautas.mickevicius@ktu.lt](mailto:vytautas.mickevicius@ktu.lt) (V.M.)

<sup>2</sup> Department of Physical and Inorganic Chemistry, Kaunas University of Technology, Radvilėnų pl. 19, LT-50254 Kaunas, Lithuania; [kristina.kantminiene@ktu.lt](mailto:kristina.kantminiene@ktu.lt)

<sup>3</sup> Laboratory of Drug Targets Histopathology, Institute of Cardiology, Lithuanian University of Health Sciences, Sukilėlių pr. 13, LT-50162 Kaunas, Lithuania; [vilma.petrikaite@lsmuni.lt](mailto:vilma.petrikaite@lsmuni.lt)

<sup>4</sup> Institute of Physiology and Pharmacology, Faculty of Medicine, Lithuanian University of Health Sciences, A. Mickevičiaus g. 9, LT-44307 Kaunas, Lithuania; [vilma.petrikaite@lsmuni.lt](mailto:vilma.petrikaite@lsmuni.lt)

<sup>5</sup> Institute of Biotechnology, Life Sciences Center, Vilnius University, Saulėtekio al. 7, LT-10257 Vilnius, Lithuania; [vilma.petrikaite@lsmuni.lt](mailto:vilma.petrikaite@lsmuni.lt)

\* Correspondence: [kristina.kantminiene@ktu.lt](mailto:kristina.kantminiene@ktu.lt)

## Table of contents

**Figure S1.** <sup>1</sup>H NMR (400 MHz, DMSO-*d*<sub>6</sub>) spectrum of **12**

**Figure S2.** <sup>13</sup>C NMR (101 MHz, DMSO-*d*<sub>6</sub>) spectrum of **12**

**Figure S3.** HRMS spectrum of **12**

**Figure S4.** <sup>1</sup>H NMR (400 MHz, DMSO-*d*<sub>6</sub>) spectrum of **13**

**Figure S5.** <sup>13</sup>C NMR (101 MHz, DMSO-*d*<sub>6</sub>) spectrum of **13**

**Figure S6.** HRMS spectrum of **13**

**Figure S7.** <sup>1</sup>H NMR (400 MHz, DMSO-*d*<sub>6</sub>) spectrum of **14**

**Figure S8.** <sup>13</sup>C NMR (101 MHz, DMSO-*d*<sub>6</sub>) spectrum of **14**

**Figure S9.** HRMS spectrum of **14**

**Figure S10.** <sup>1</sup>H NMR (400 MHz, DMSO-*d*<sub>6</sub>) spectrum of **15**

**Figure S11.** <sup>13</sup>C NMR (101 MHz, DMSO-*d*<sub>6</sub>) spectrum of **15**

**Figure S12.** HRMS spectrum of **15**

**Figure S13.** <sup>1</sup>H NMR (400 MHz, DMSO-*d*<sub>6</sub>) spectrum of **16**

**Figure S14.** <sup>13</sup>C NMR (101 MHz, DMSO-*d*<sub>6</sub>) spectrum of **16**

**Figure S15.** HRMS spectrum of **16**

**Figure S16.**  $^1\text{H}$  NMR (400 MHz,  $\text{DMSO-}d_6$ ) spectrum of **17**

**Figure S17.**  $^{13}\text{C}$  NMR (400 MHz,  $\text{DMSO-}d_6$ ) spectrum of **17**

**Figure S18.** HRMS spectrum of **17**

**Figure S19.**  $^1\text{H}$  NMR (400 MHz,  $\text{DMSO-}d_6$ ) spectrum of **18**

**Figure S20.**  $^{13}\text{C}$  NMR (101 MHz,  $\text{DMSO-}d_6$ ) spectrum of **18**

**Figure S21.** HRMS spectrum of **18**

**Figure S22.**  $^1\text{H}$  NMR (400 MHz,  $\text{DMSO-}d_6$ ) spectrum of **19**

**Figure S23.**  $^{13}\text{C}$  NMR (101 MHz,  $\text{DMSO-}d_6$ ) spectrum of **19**

**Figure S24.** HRMS spectrum of **19**

**Figure S25.**  $^1\text{H}$  NMR (400 MHz,  $\text{DMSO-}d_6$ ) spectrum of **20**

**Figure S26.**  $^{13}\text{C}$  NMR (101 MHz,  $\text{DMSO-}d_6$ ) spectrum of **20**

**Figure S27.** HRMS spectrum of **20**

**Figure S28.**  $^1\text{H}$  NMR (400 MHz,  $\text{DMSO-}d_6$ ) spectrum of **21**

**Figure S29.**  $^{13}\text{C}$  NMR (101 MHz,  $\text{DMSO-}d_6$ ) spectrum of **21**

**Figure S30.** HRMS spectrum of **21**

**Figure S31.**  $^1\text{H}$  NMR (400 MHz,  $\text{DMSO-}d_6$ ) spectrum of **22**

**Figure S32.**  $^{13}\text{C}$  NMR (101 MHz,  $\text{DMSO-}d_6$ ) spectrum of **22**

**Figure S33.** HRMS spectrum of **22**

**Figure S34.**  $^1\text{H}$  NMR (400 MHz,  $\text{DMSO-}d_6$ ) spectrum of **26**

**Figure S35.**  $^{13}\text{C}$  NMR (101 MHz,  $\text{DMSO-}d_6$ ) spectrum of **26**

**Figure S36.** HRMS spectrum of **26**

**Figure S37.**  $^1\text{H}$  NMR (400 MHz,  $\text{DMSO-}d_6$ ) spectrum of **27**

**Figure S38.**  $^{13}\text{C}$  NMR (101 MHz,  $\text{DMSO-}d_6$ ) spectrum of **27**

**Figure S39.** HRMS spectrum of **27**

**Figure S40.**  $^1\text{H}$  NMR (400 MHz,  $\text{DMSO-}d_6$ ) spectrum of **28**

**Figure S41.**  $^{13}\text{C}$  NMR (101 MHz,  $\text{DMSO-}d_6$ ) spectrum of **28**

**Figure S42.** HRMS spectrum of **28**

**Figure S43.**  $^1\text{H}$  NMR (400 MHz,  $\text{DMSO-}d_6$ ) spectrum of **30**

**Figure S44.**  $^{13}\text{C}$  NMR (101 MHz,  $\text{DMSO-}d_6$ ) spectrum of **30**

**Figure S45.** HRMS spectrum of **30**

**Figure S46.**  $^1\text{H}$  NMR (400 MHz,  $\text{DMSO-}d_6$ ) spectrum of **32**

**Figure S47.**  $^{13}\text{C}$  NMR (101 MHz,  $\text{DMSO-}d_6$ ) spectrum of **32**

**Figure S48.** HRMS spectrum of **32**

**Figure S49.**  $^1\text{H}$  NMR (400 MHz,  $\text{DMSO-}d_6$ ) spectrum of **33**

**Figure S50.**  $^{13}\text{C}$  NMR (101 MHz,  $\text{DMSO-}d_6$ ) spectrum of **33**

**Figure S51.** HRMS spectrum of **33**

**Figure S52.**  $^1\text{H}$  NMR (400 MHz,  $\text{DMSO-}d_6$ ) spectrum of **34**

**Figure S53.**  $^{13}\text{C}$  NMR (101 MHz,  $\text{DMSO-}d_6$ ) spectrum of **34**

**Figure S54.**  $^1\text{H}$  NMR (400 MHz,  $\text{DMSO-}d_6$ ) spectrum of **35**

**Figure S55.**  $^{13}\text{C}$  NMR (101 MHz,  $\text{DMSO-}d_6$ ) spectrum of **35**

**Figure S56.** HRMS spectrum of **35**

**Figure S57.**  $^1\text{H}$  NMR (400 MHz,  $\text{DMSO-}d_6$ ) spectrum of **36**

**Figure S58.**  $^{13}\text{C}$  NMR (101 MHz,  $\text{DMSO-}d_6$ ) spectrum of **36**

**Figure S59.** HRMS spectrum of **36**

**Figure S60.**  $^1\text{H}$  NMR (400 MHz,  $\text{DMSO-}d_6$ ) spectrum of **37**

**Figure S61.**  $^{13}\text{C}$  NMR (101 MHz,  $\text{DMSO-}d_6$ ) spectrum of **37**

**Figure S62.** HRMS spectrum of **37**

**Figure S63.**  $^1\text{H}$  NMR (400 MHz,  $\text{DMSO-}d_6$ ) spectrum of **38**

**Figure S64.**  $^{13}\text{C}$  NMR (101 MHz,  $\text{DMSO-}d_6$ ) spectrum of **38**

**Figure S65.** HRMS spectrum of **38**

**Figure S66.**  $^1\text{H}$  NMR (400 MHz,  $\text{DMSO-}d_6$ ) spectrum of **39**

**Figure S67.**  $^{13}\text{C}$  NMR (101 MHz,  $\text{DMSO-}d_6$ ) spectrum of **39**

**Figure S68.** HRMS spectrum of **39**

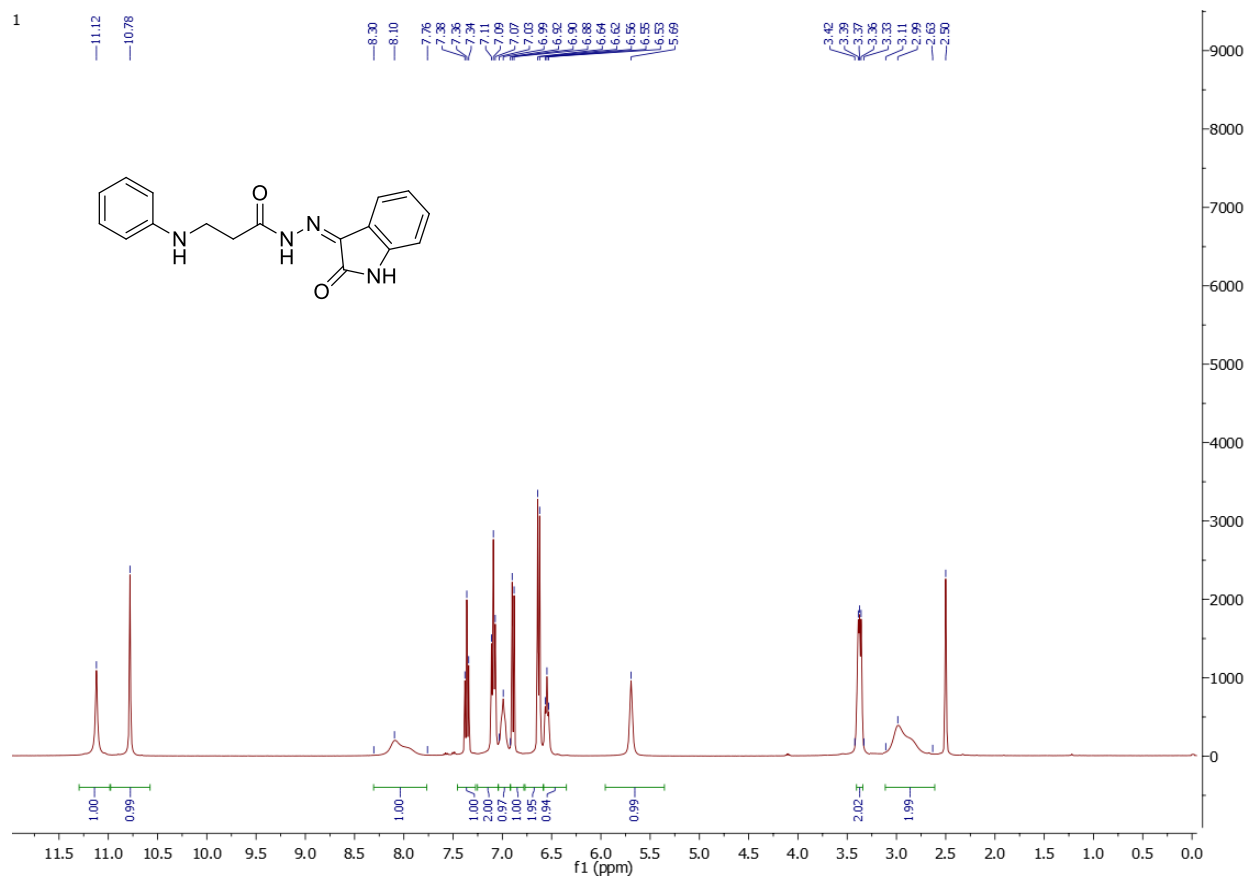

Figure S1. <sup>1</sup>H NMR (400 MHz, DMSO-*d*<sub>6</sub>) spectrum of 12

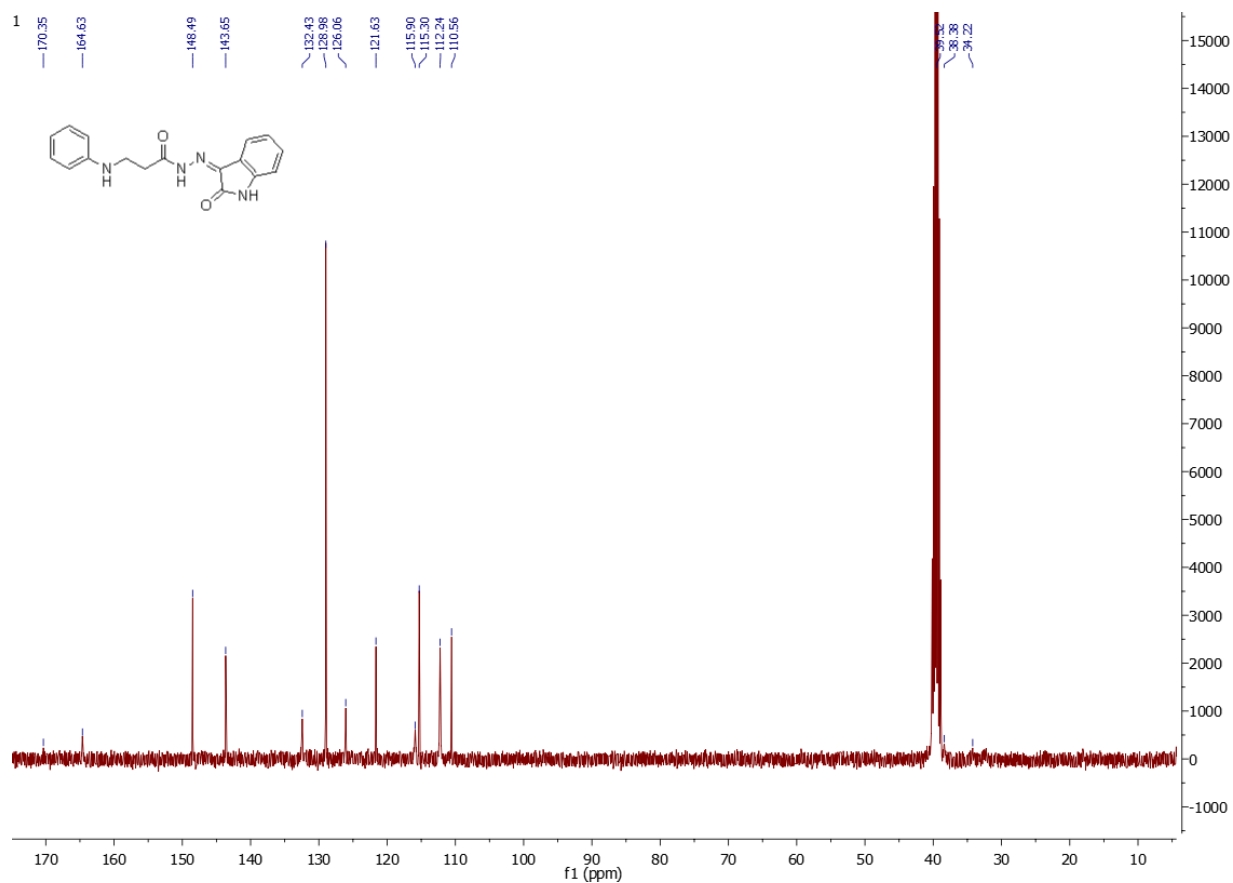

Figure S2.  $^{13}\text{C}$  NMR (101 MHz,  $\text{DMSO-}d_6$ ) spectrum of 12

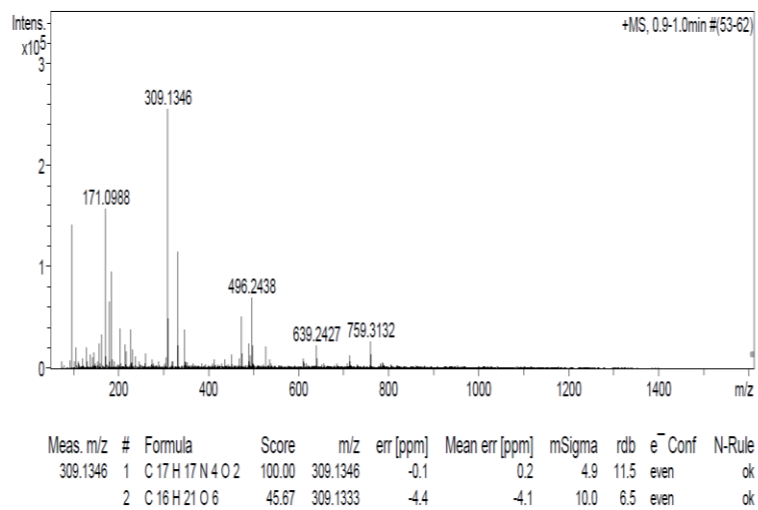

Figure S3. HRMS spectrum of 12

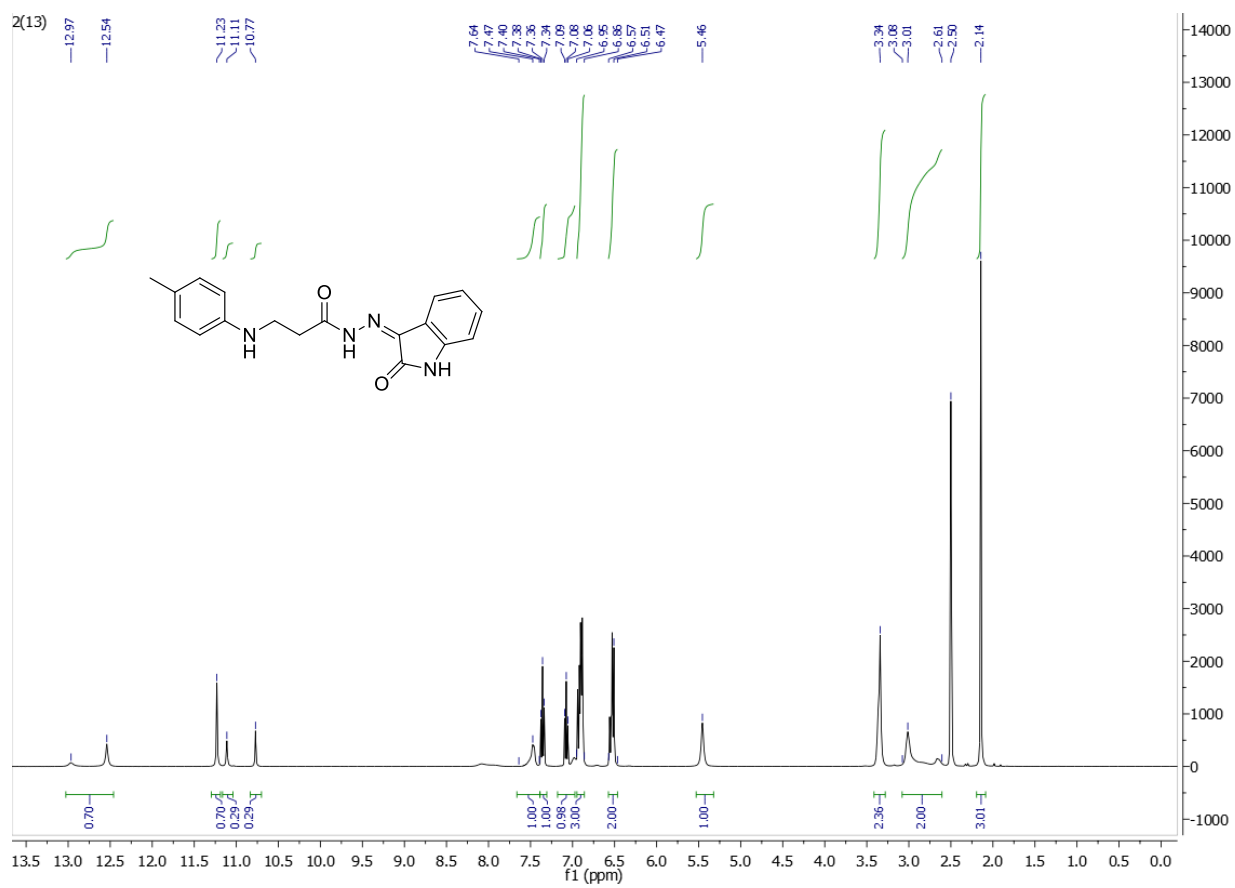

**Figure S4.**  $^1\text{H}$  NMR (400 MHz,  $\text{DMSO}-d_6$ ) spectrum of **13**

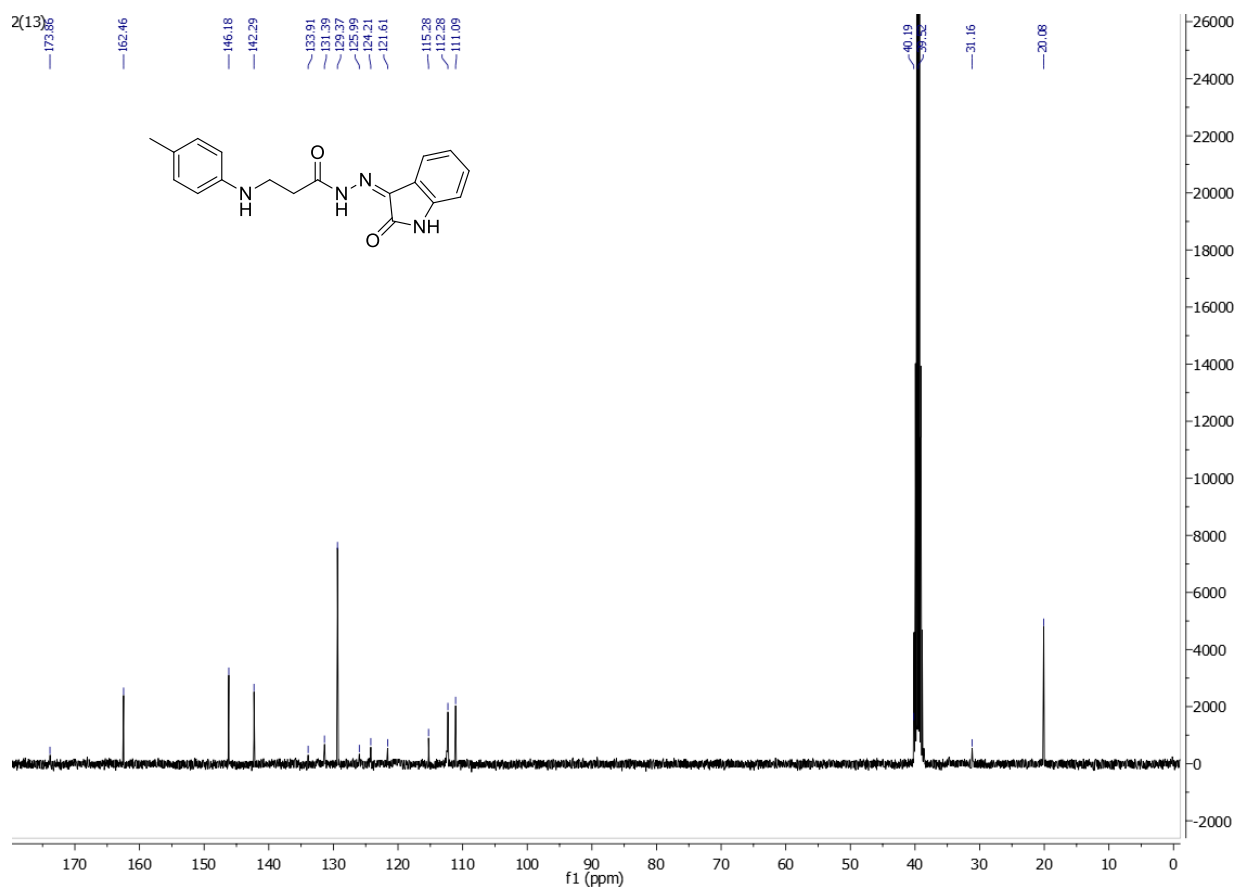

**Figure S5.** <sup>13</sup>C NMR (101 MHz, DMSO-*d*<sub>6</sub>) spectrum of 13

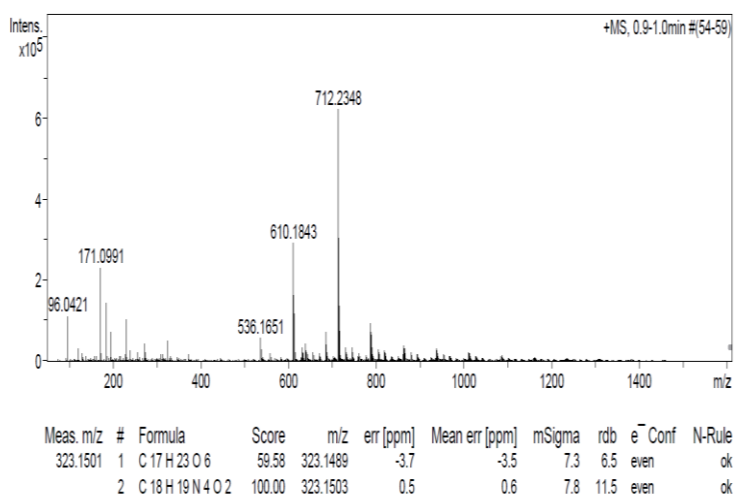

**Figure S6.** HRMS spectrum of 13

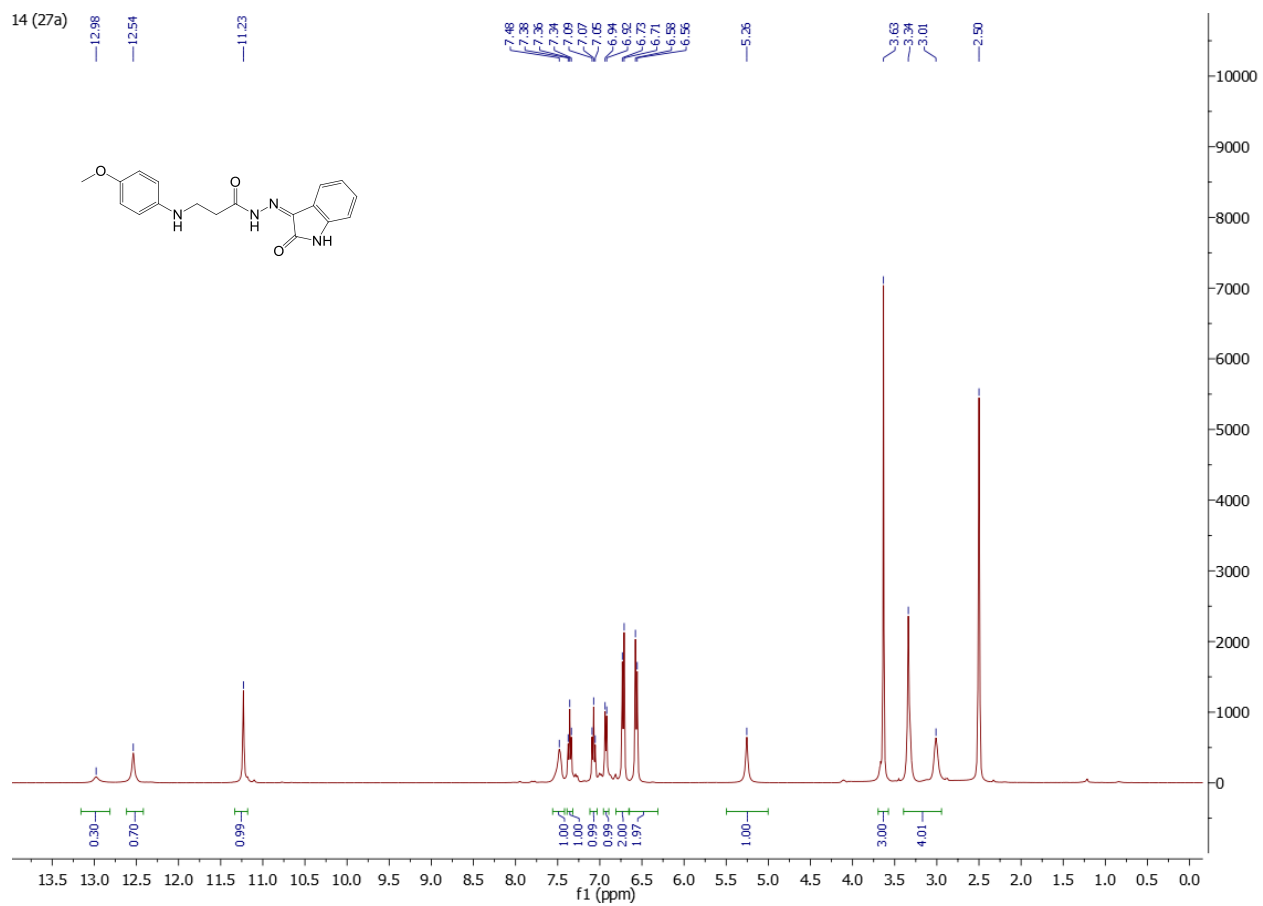

**Figure S7.** <sup>1</sup>H NMR (400 MHz, DMSO-*d*<sub>6</sub>) spectrum of **14**



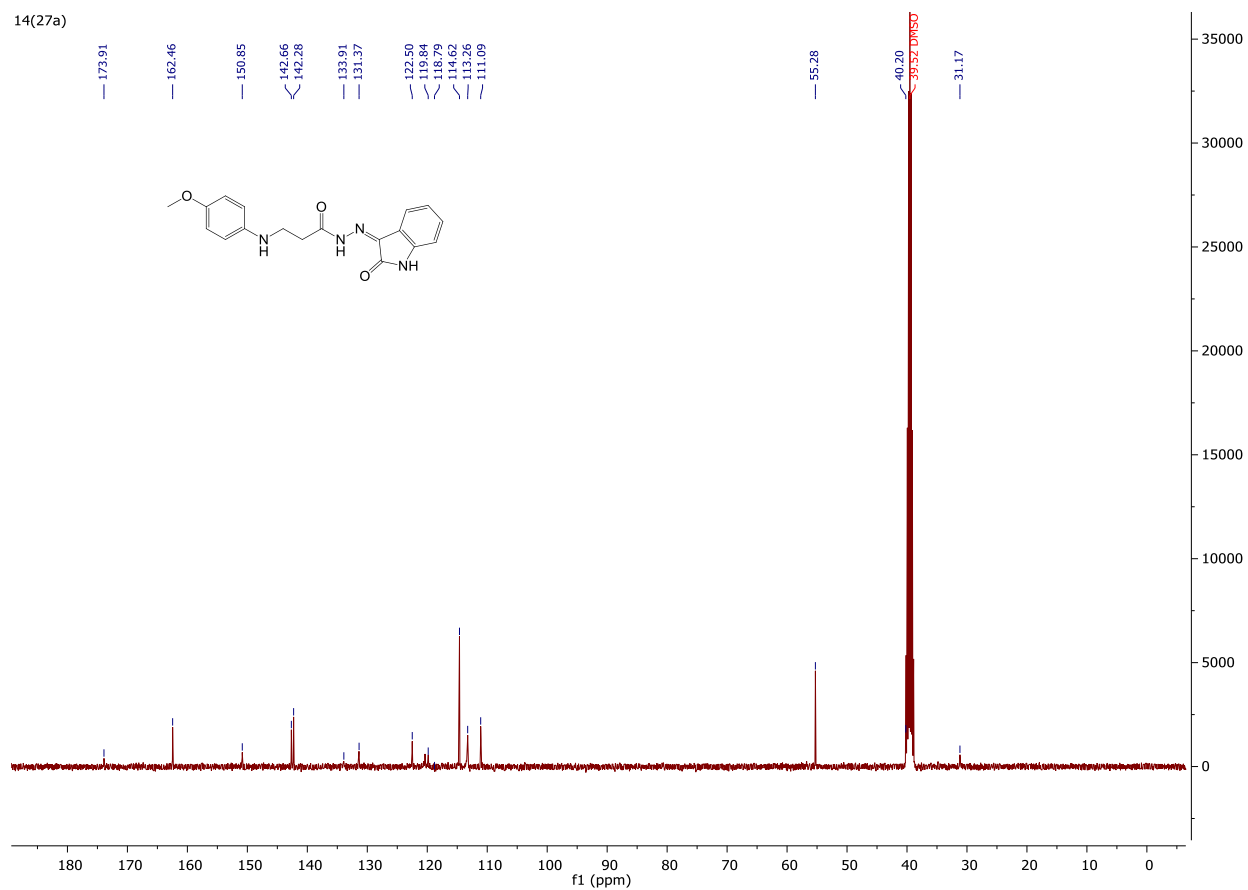

Figure S8.  $^{13}\text{C}$  NMR (101 MHz,  $\text{DMSO}-d_6$ ) spectrum of **14**

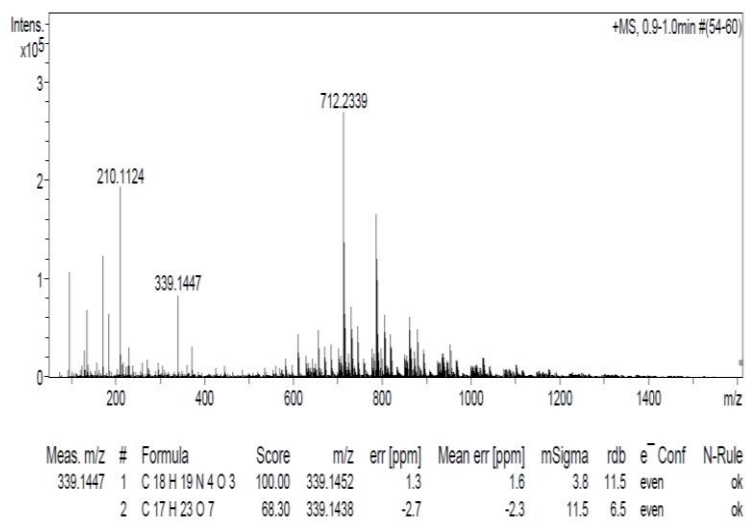

Figure S9. HRMS spectrum of **14**

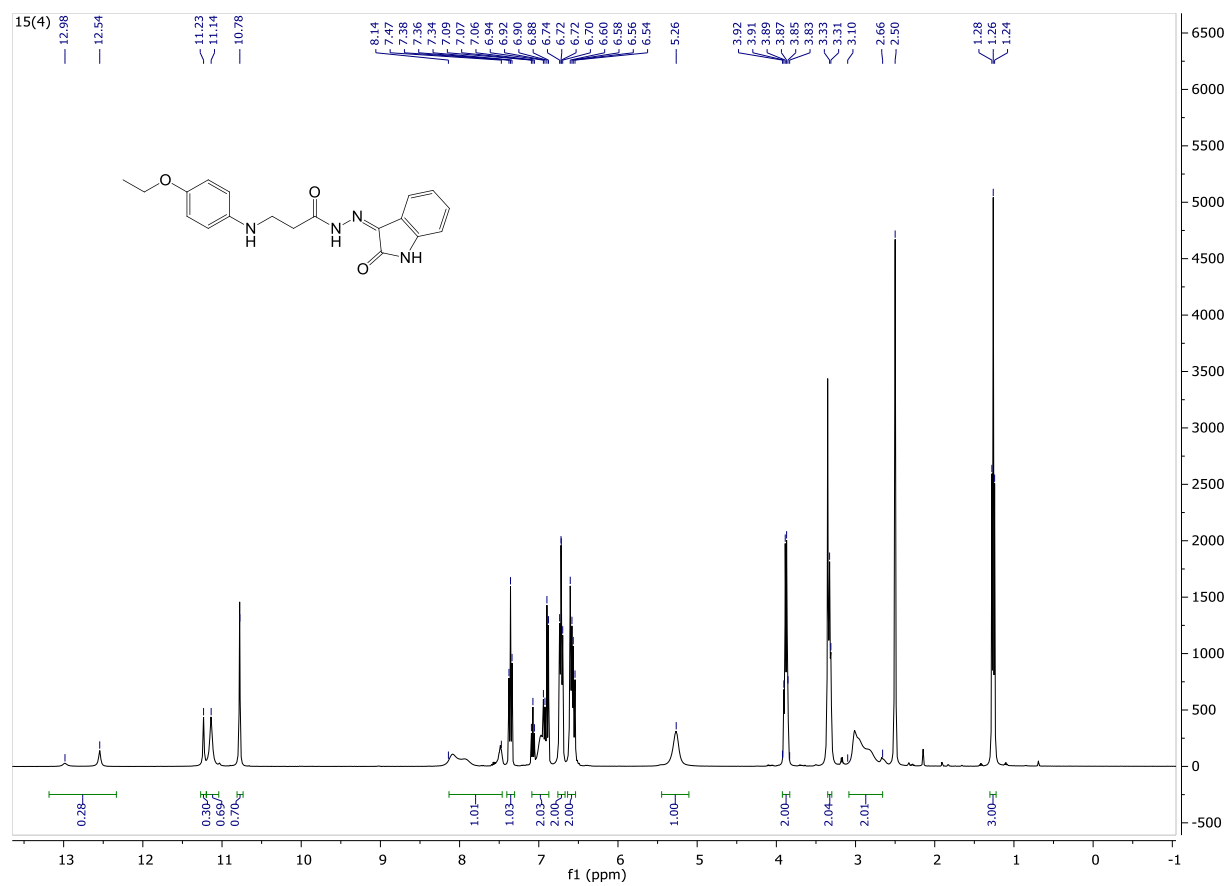

**Figure S10.**  $^1\text{H}$  NMR (400 MHz,  $\text{DMSO-}d_6$ ) spectrum of **15**

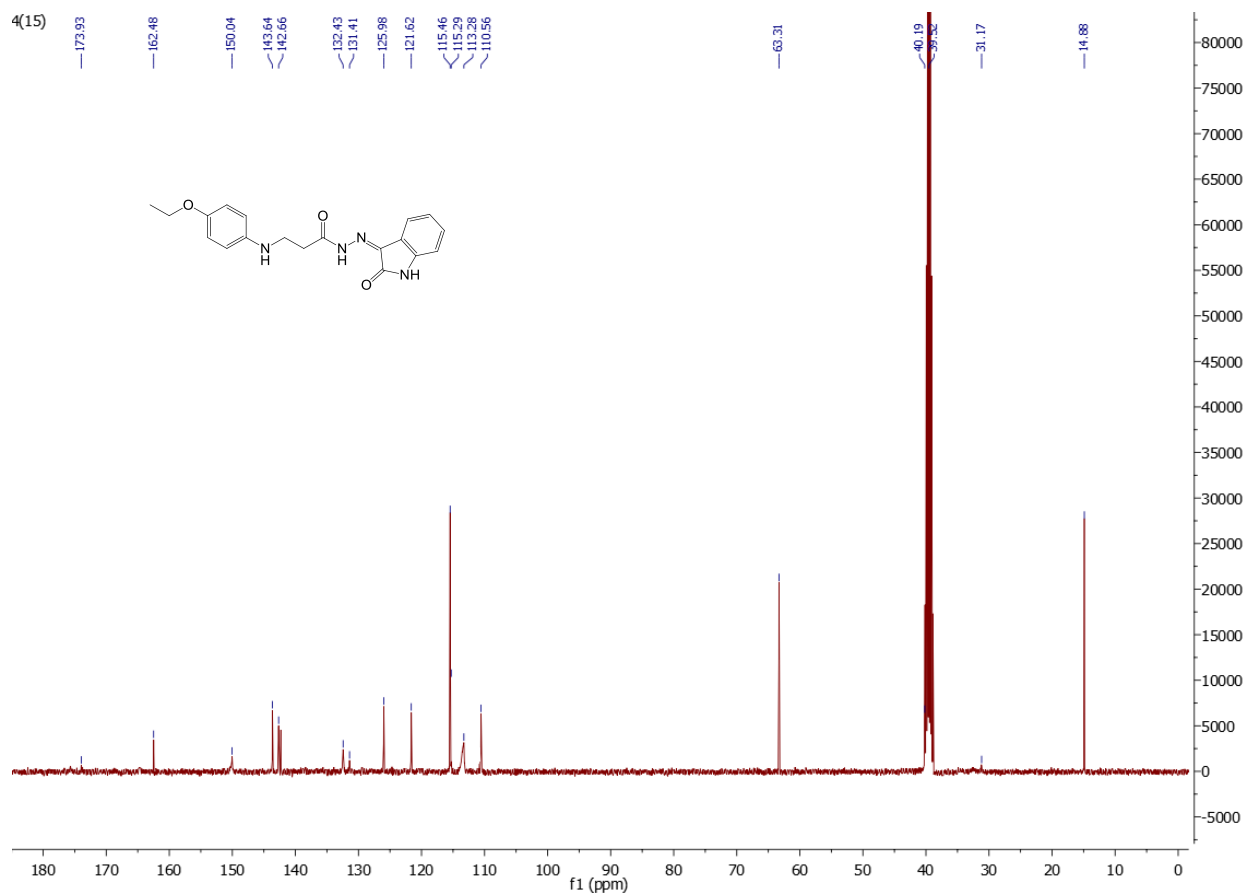

**Figure S11.**  $^{13}\text{C}$  NMR (101 MHz,  $\text{DMSO}-d_6$ ) spectrum of **15**

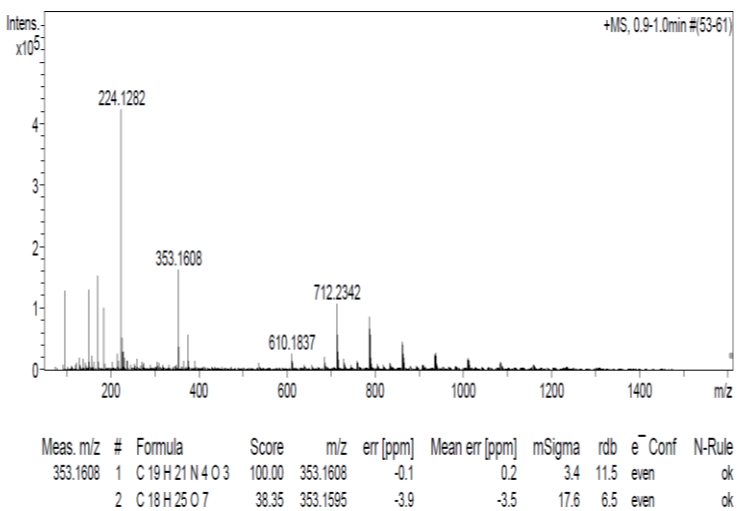

**Figure S12.** HRMS spectrum of **15**

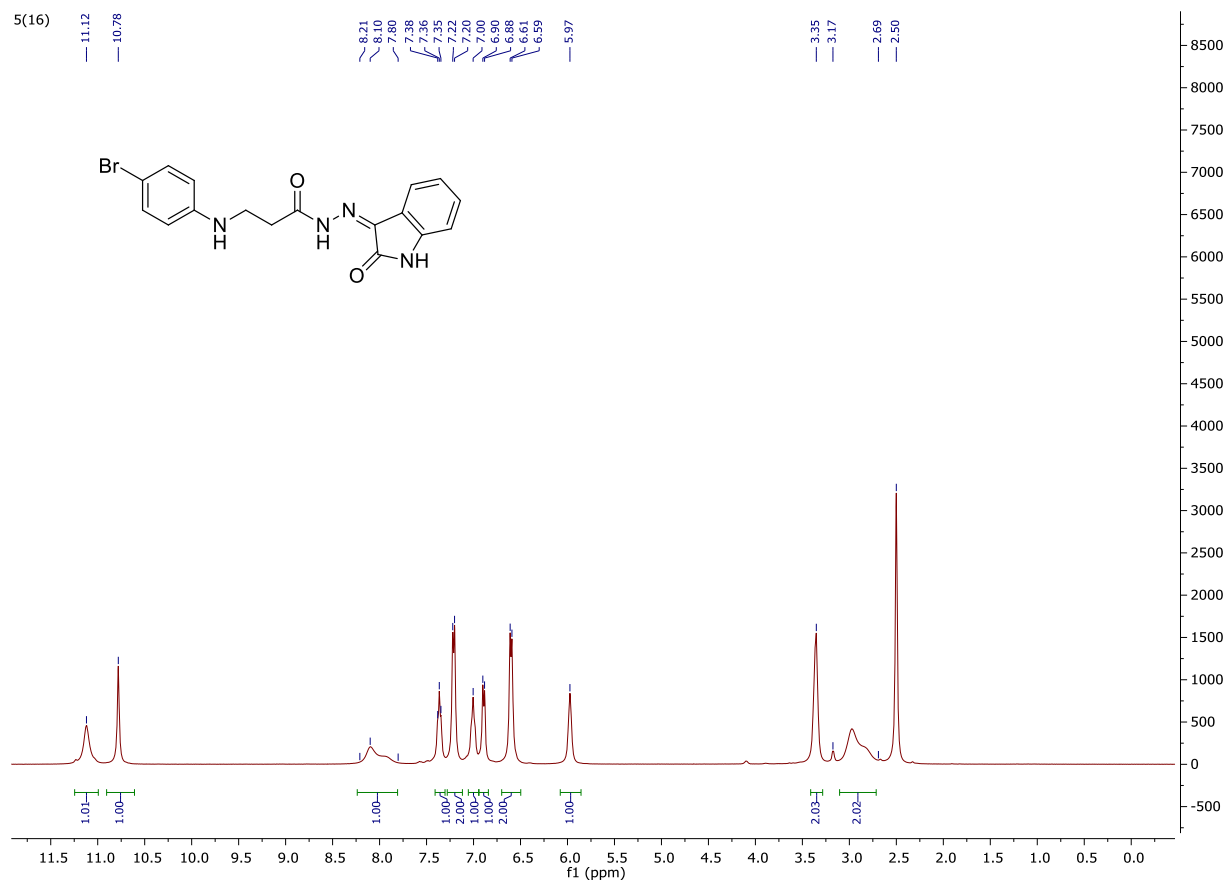

**Figure S13.**  $^1\text{H}$  NMR (400 MHz,  $\text{DMSO}-d_6$ ) spectrum of **16**

5

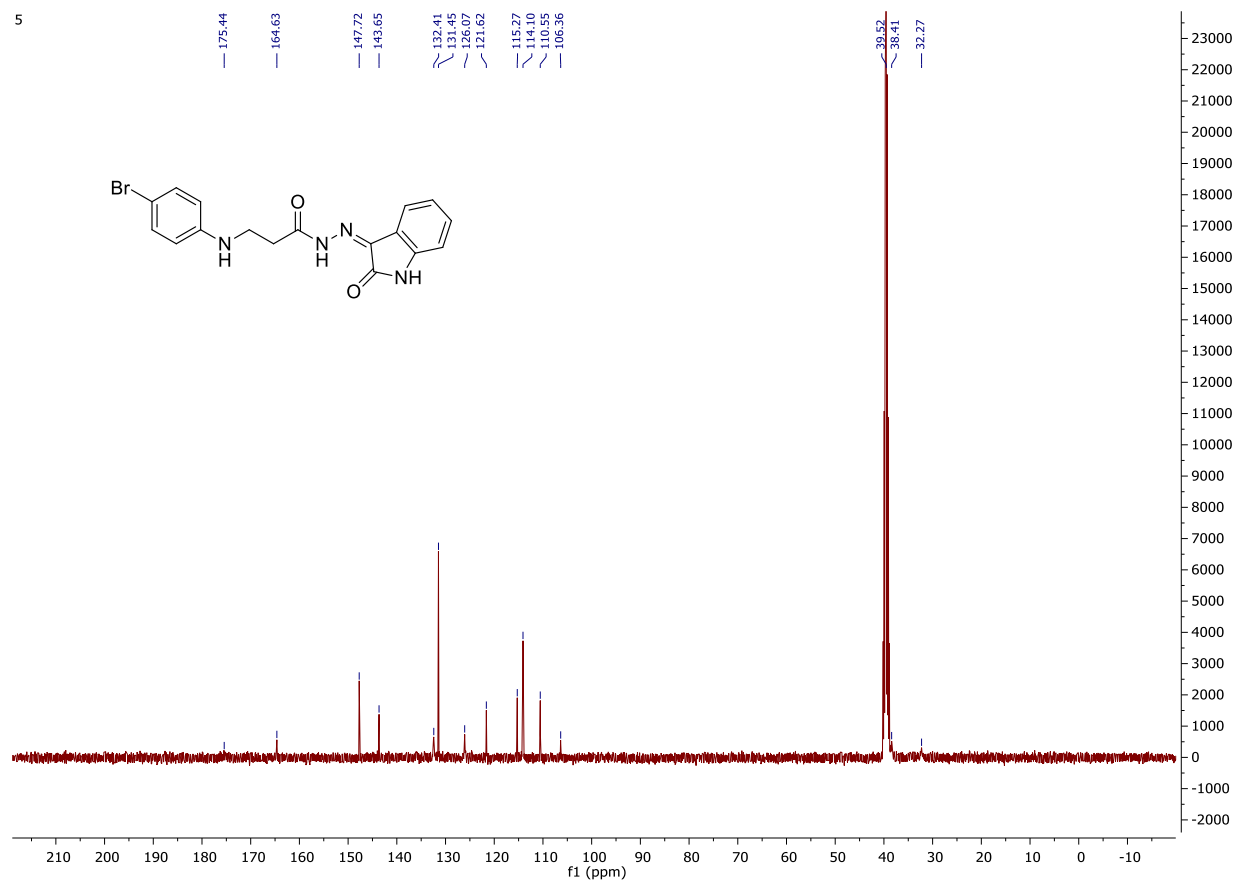

Figure S14. <sup>13</sup>C NMR (101 MHz, DMSO-*d*<sub>6</sub>) spectrum of 16

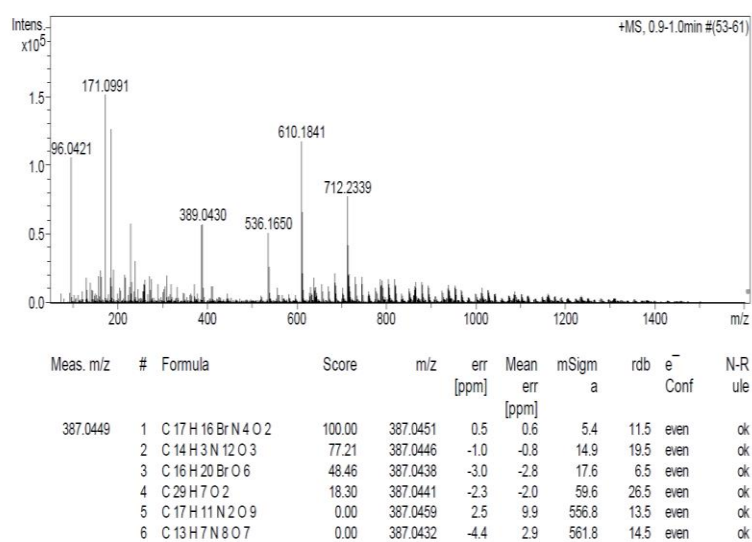

Figure S15. HRMS spectrum of 16

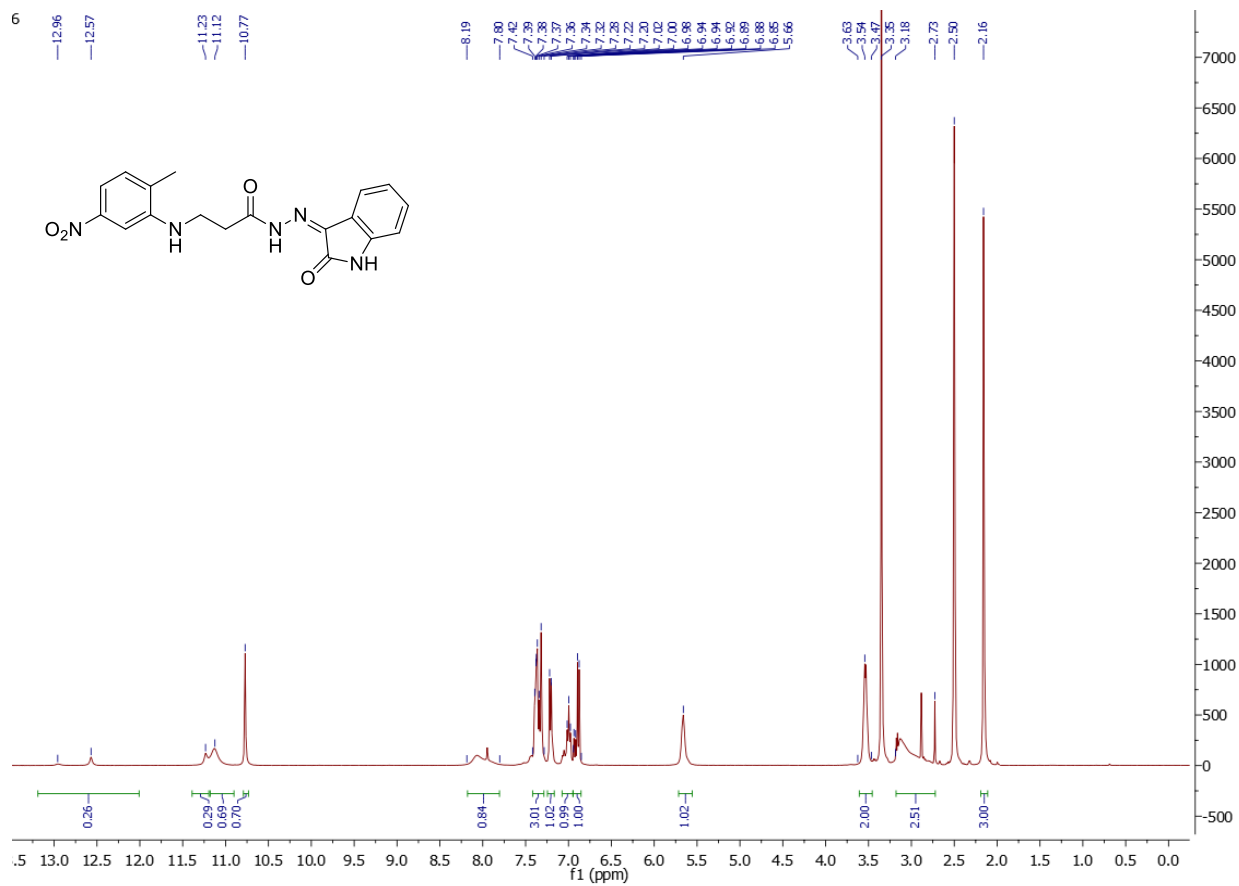

**Figure S16.** <sup>1</sup>H NMR (400 MHz, DMSO-*d*<sub>6</sub>) spectrum of **17**

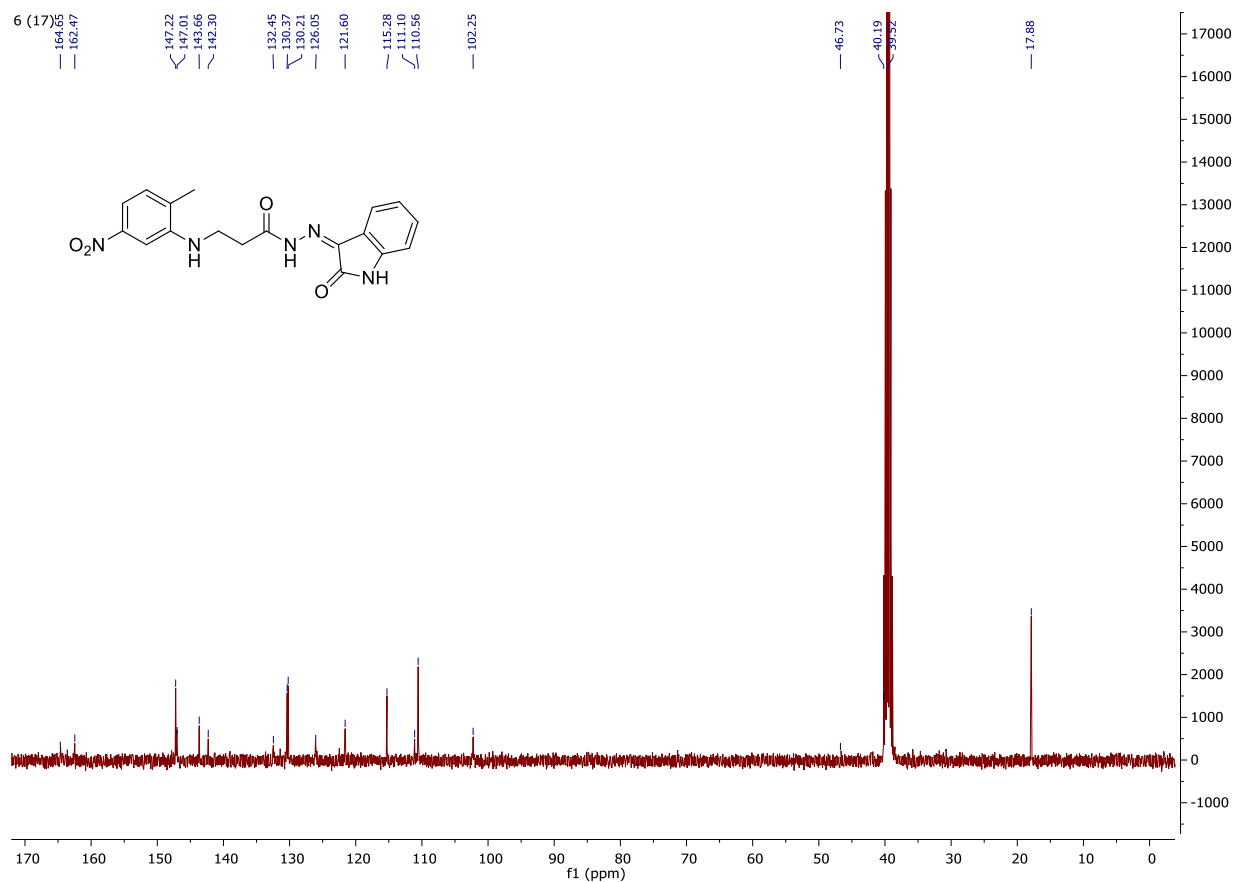

Figure S17.  $^{13}\text{C}$  NMR (101 MHz,  $\text{DMSO-}d_6$ ) spectrum of 17

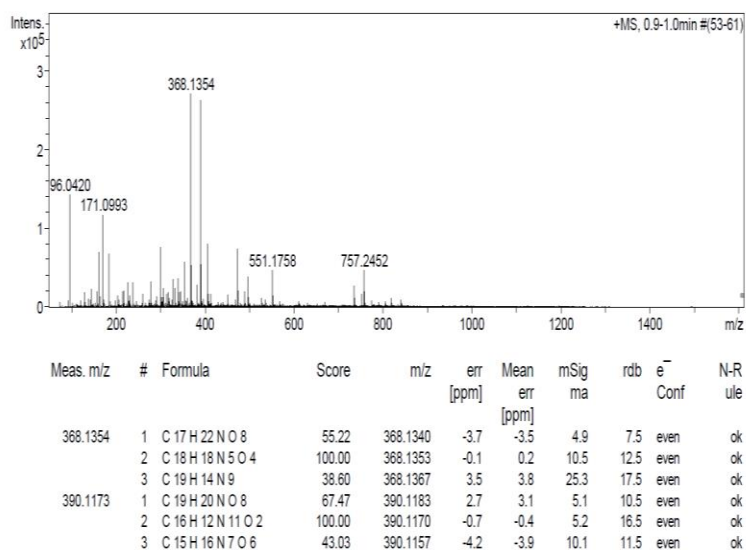

Figure S18. HRMS spectrum of 17

**Figure S19.**  $^1\text{H}$  NMR (400 MHz,  $\text{DMSO-}d_6$ ) spectrum of **18**



7

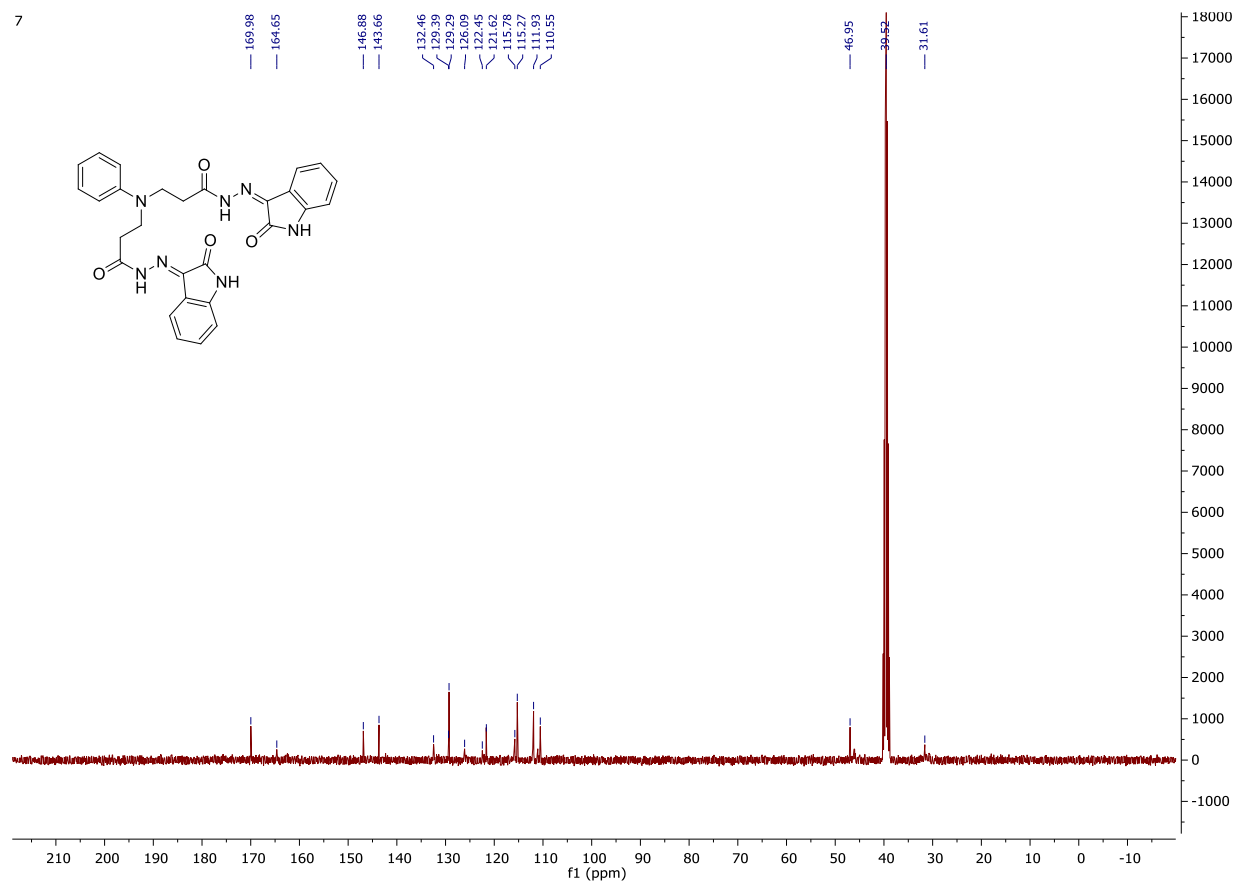

Figure S20. <sup>13</sup>C NMR (101 MHz, DMSO-*d*<sub>6</sub>) spectrum of 18

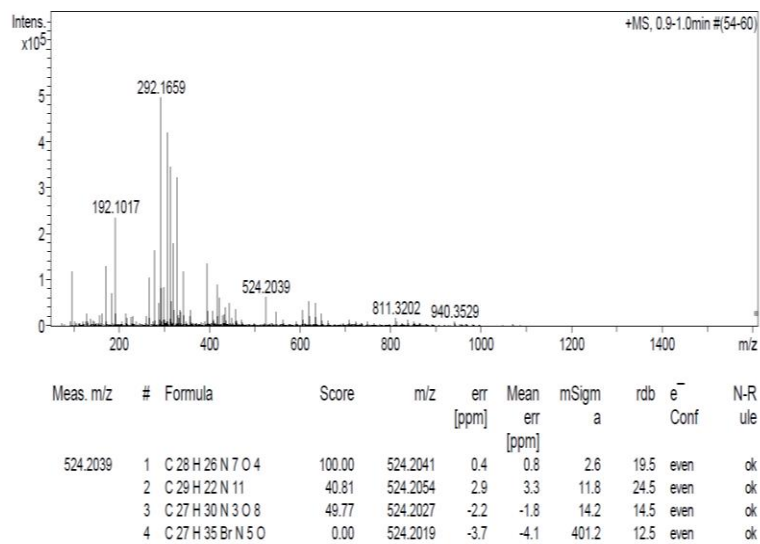

Figure S21. HRMS spectrum of 18

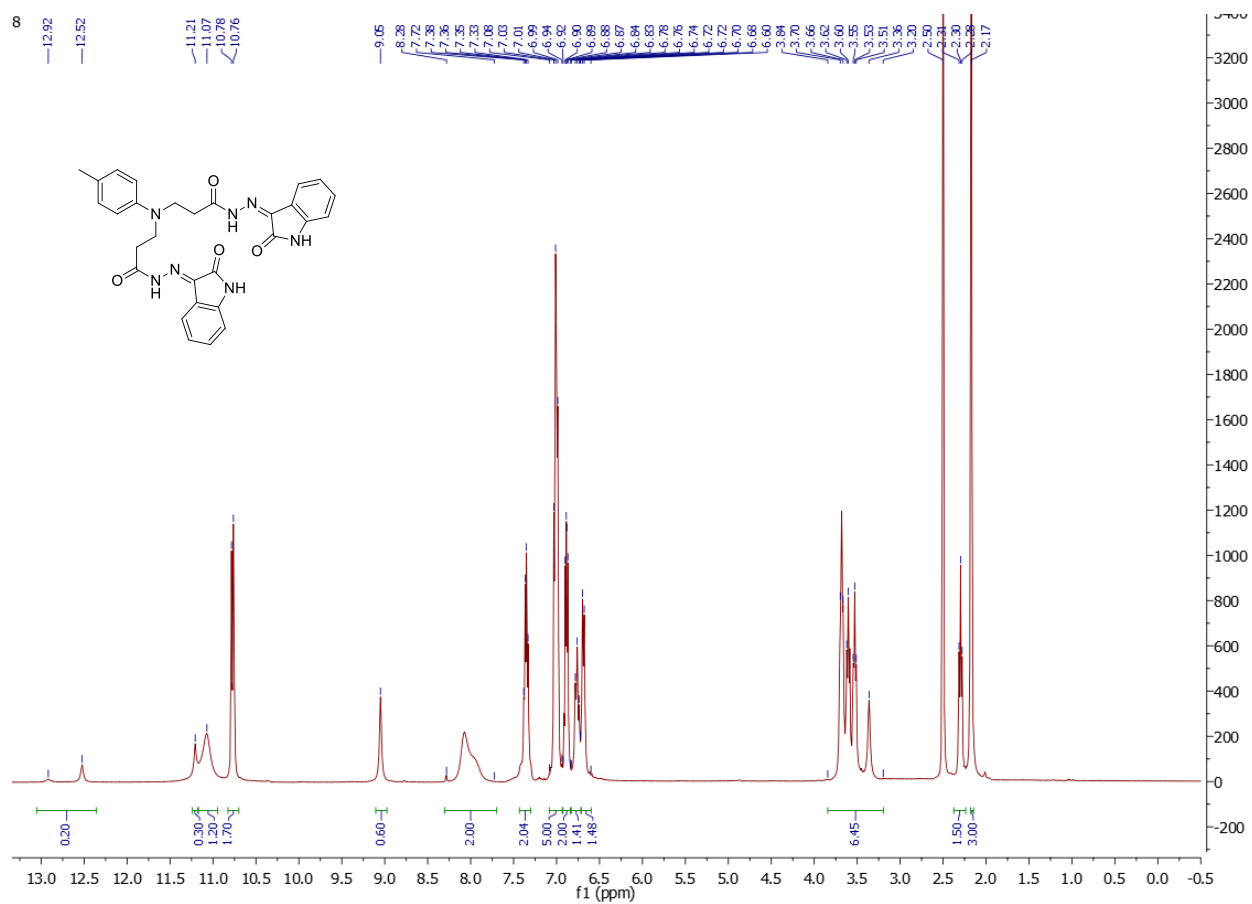

**Figure S22.** <sup>1</sup>H NMR (400 MHz, DMSO-*d*<sub>6</sub>) spectrum of **19**

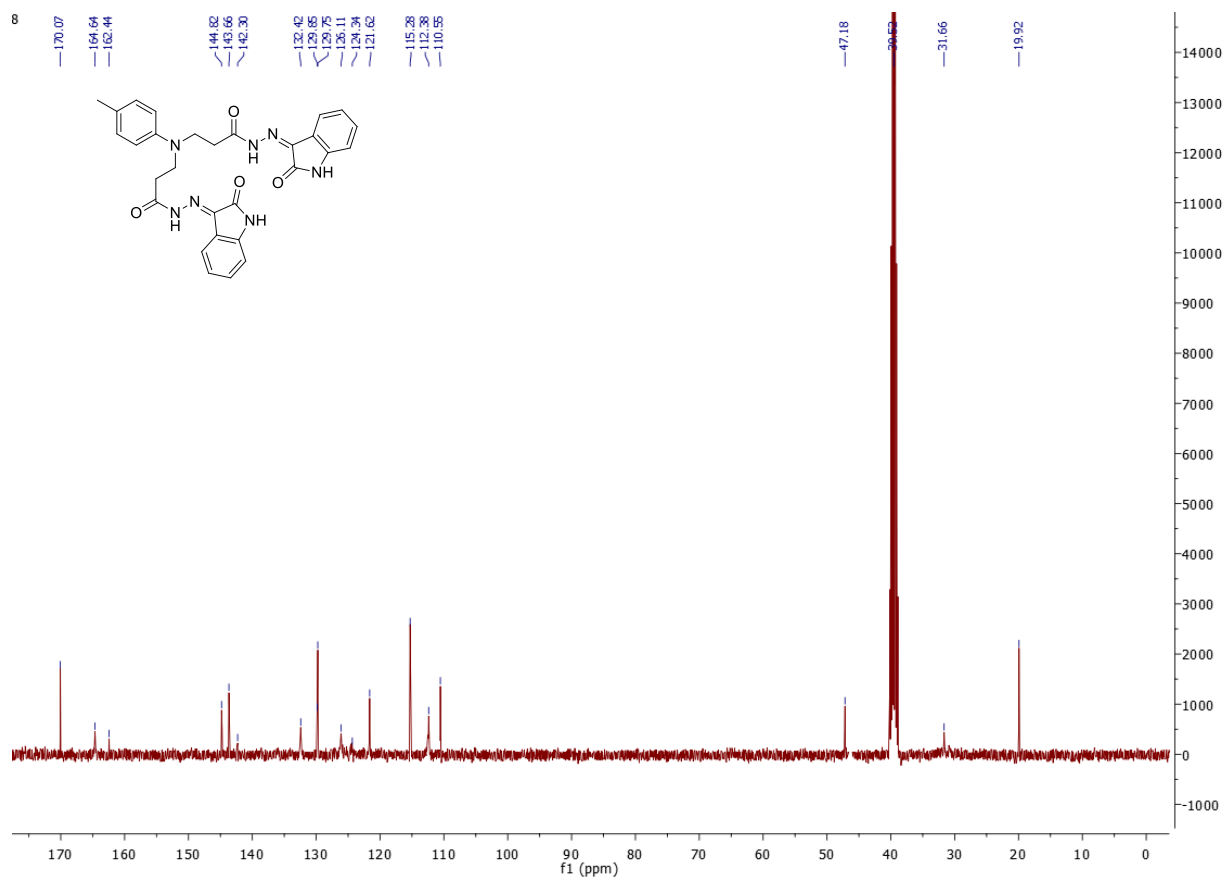

**Figure S23.**  $^{13}\text{C}$  NMR (101 MHz,  $\text{DMSO-}d_6$ ) spectrum of **19**

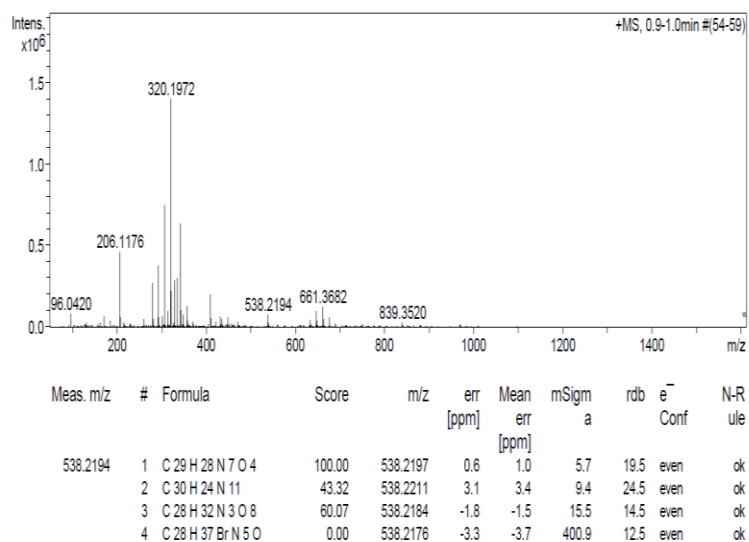

**Figure S24.** HRMS spectrum of **19**

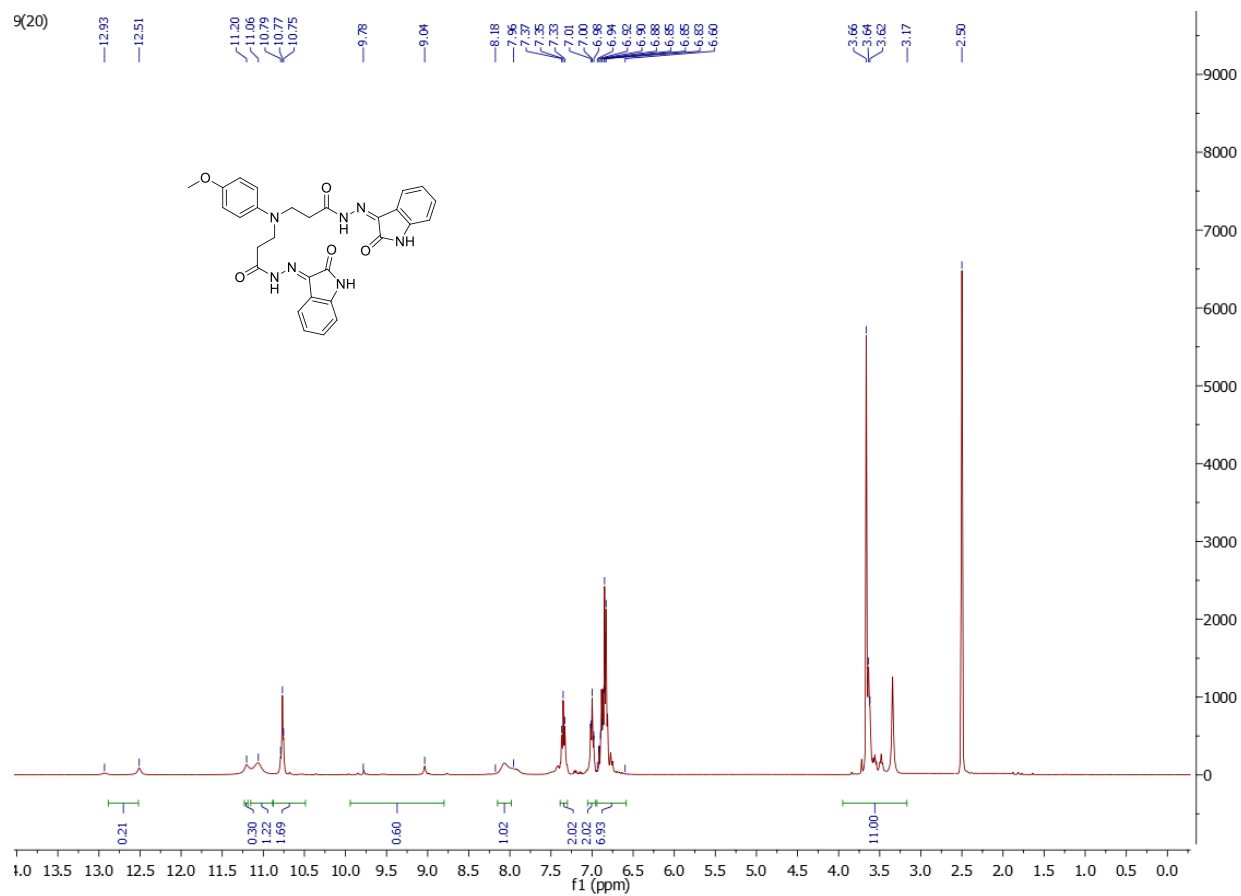

**Figure S25.** <sup>1</sup>H NMR (400 MHz, DMSO-*d*<sub>6</sub>) spectrum of 20

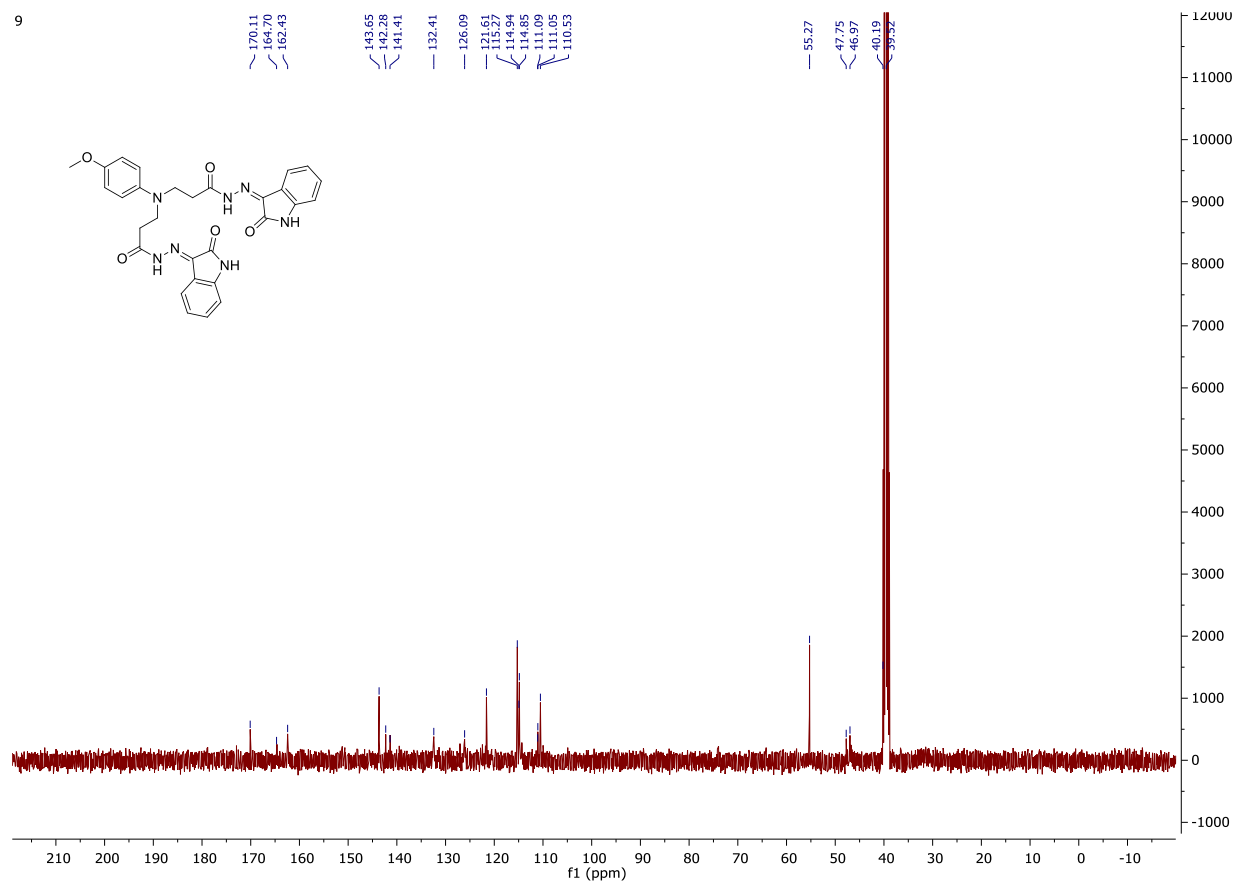

Figure S26. <sup>13</sup>C NMR (101 MHz, DMSO-*d*<sub>6</sub>) spectrum of 20

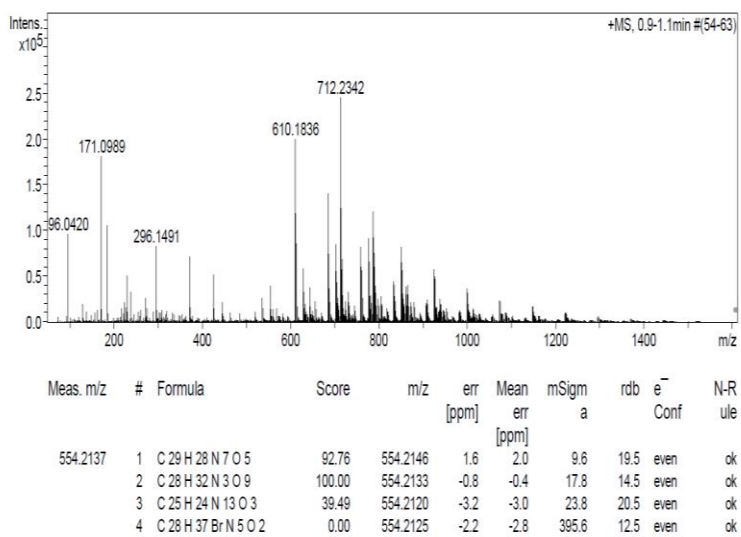

Figure S27. HRMS spectrum of 20

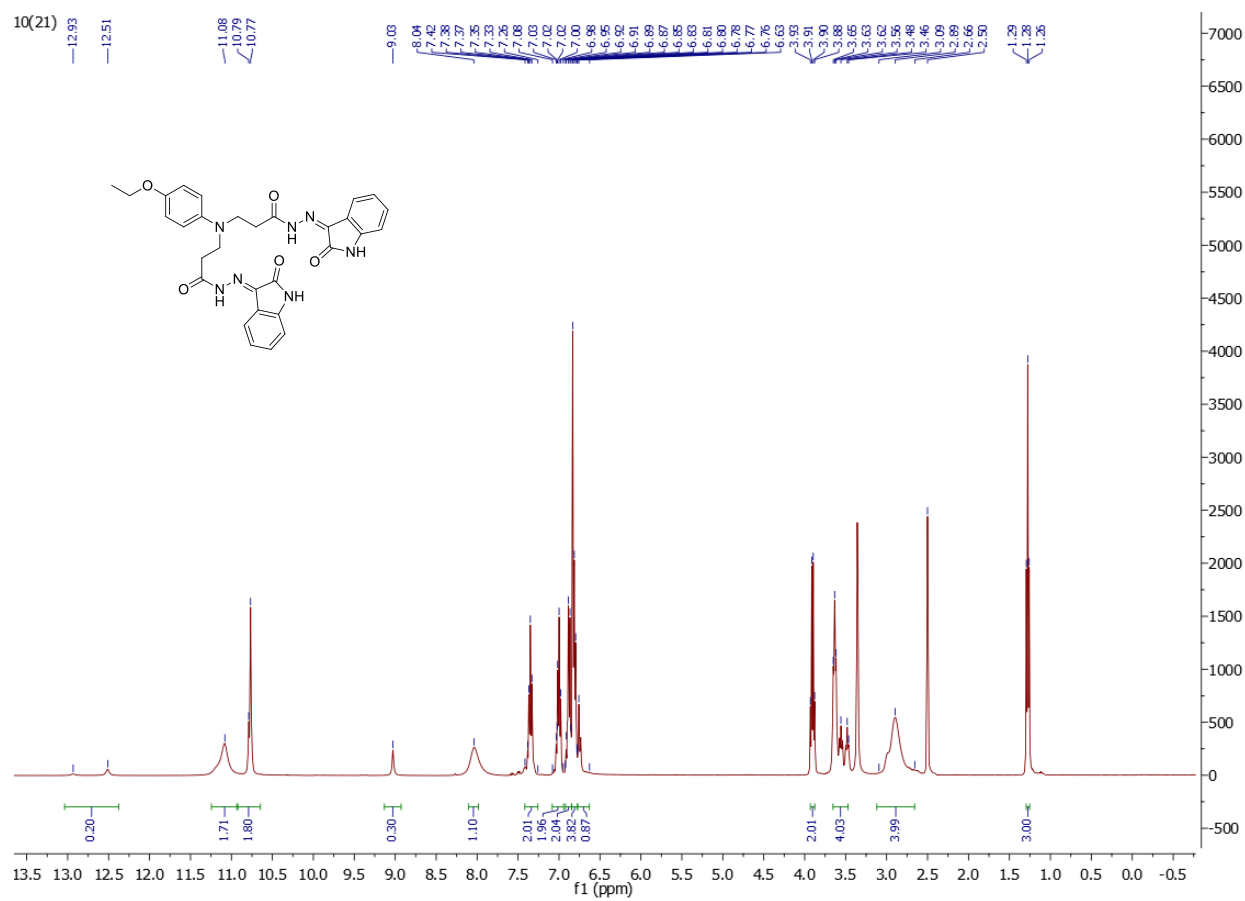

**Figure S28.**  $^1\text{H}$  NMR (400 MHz,  $\text{DMSO}-d_6$ ) spectrum of **21**

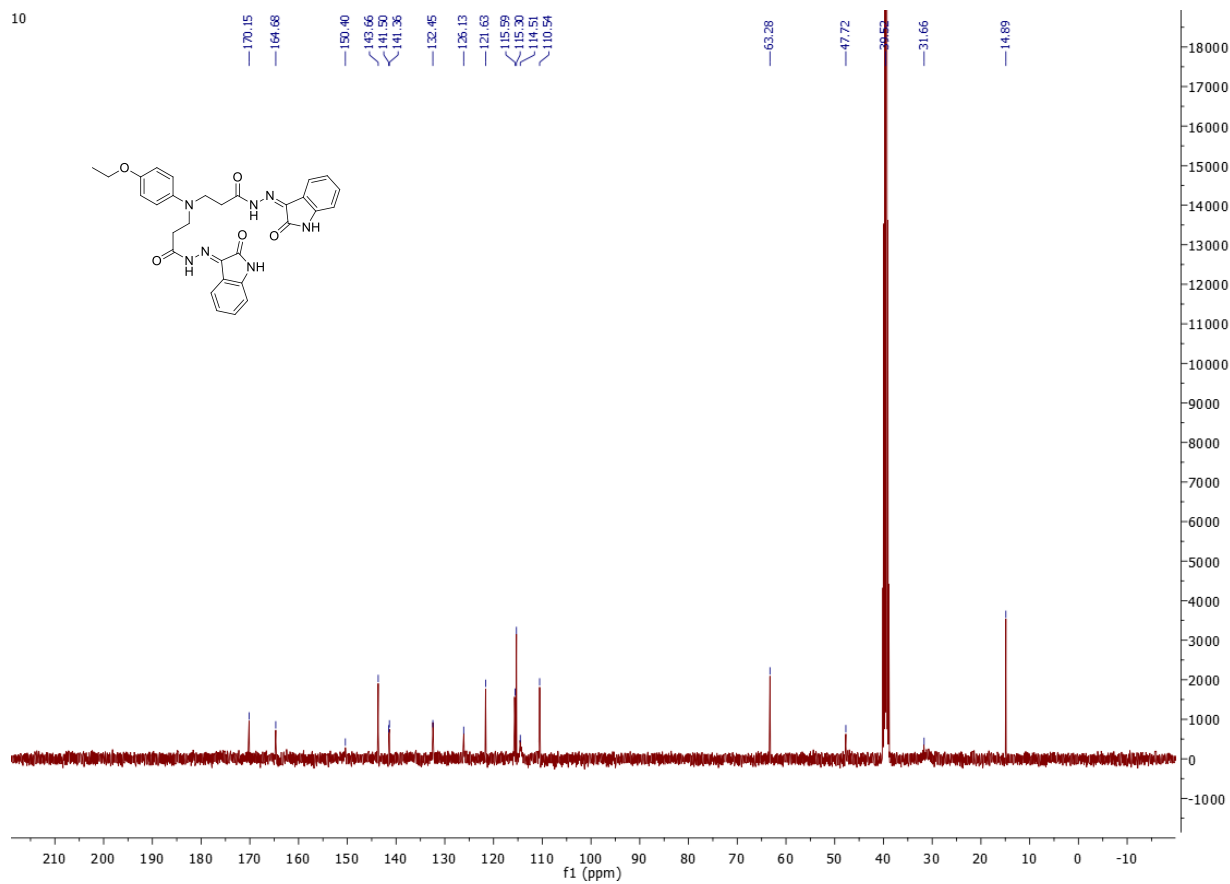

Figure S29. <sup>13</sup>C NMR (101 MHz, DMSO-*d*<sub>6</sub>) spectrum of 21

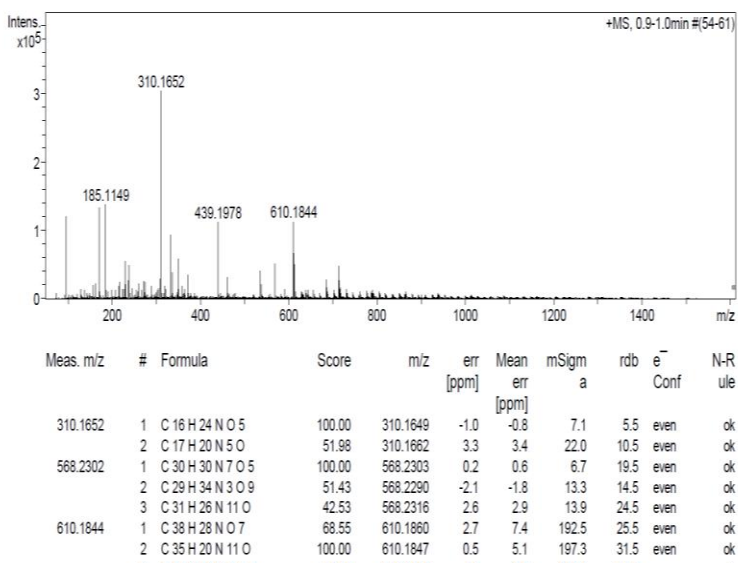

Figure S30. HRMS spectrum of 21

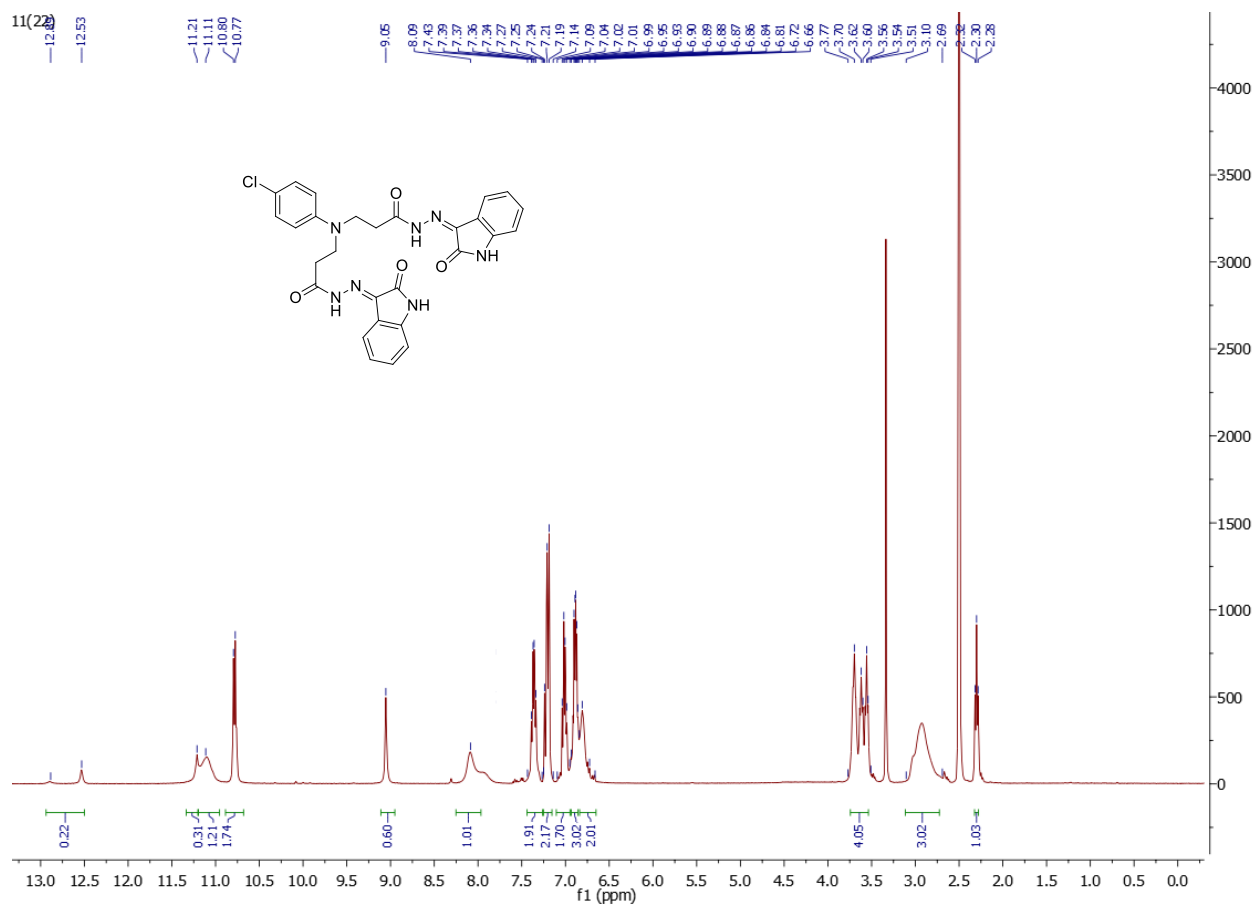

**Figure S31.**  $^1\text{H}$  NMR (400 MHz,  $\text{DMSO}-d_6$ ) spectrum of **22**



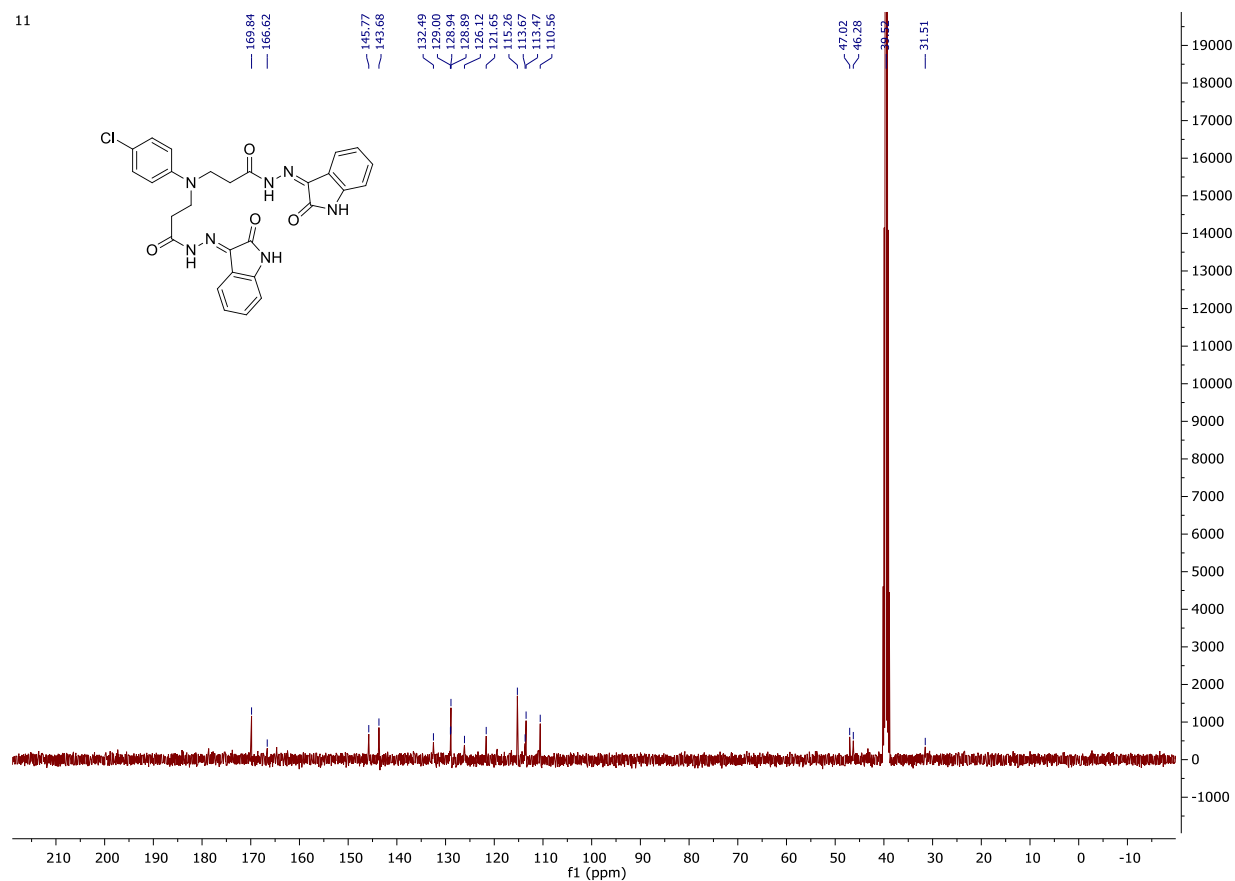

Figure S32.  $^{13}\text{C}$  NMR (101 MHz,  $\text{DMSO}-d_6$ ) spectrum of 22

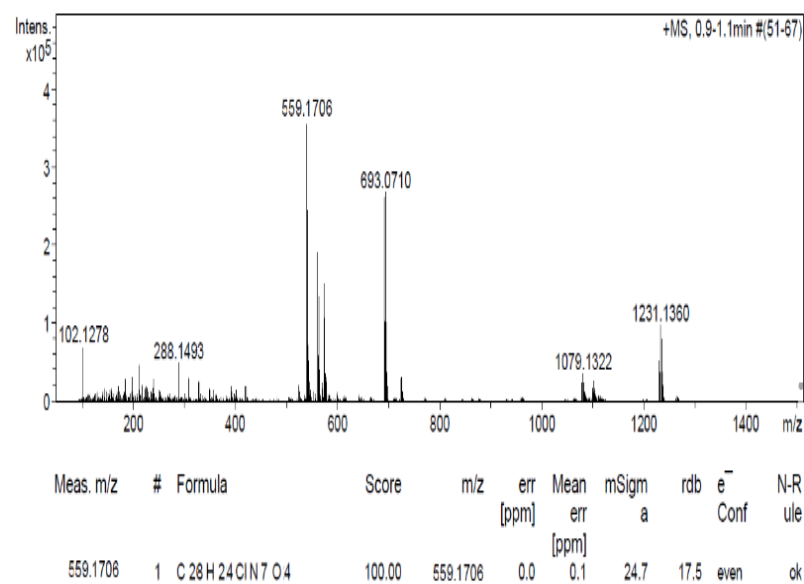

Figure S33. HRMS spectrum of 22

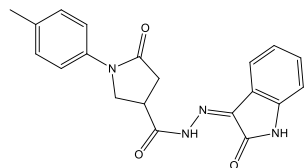

**Figure S34.**  $^1\text{H}$  NMR (400 MHz,  $\text{DMSO-}d_6$ ) spectrum of **26**

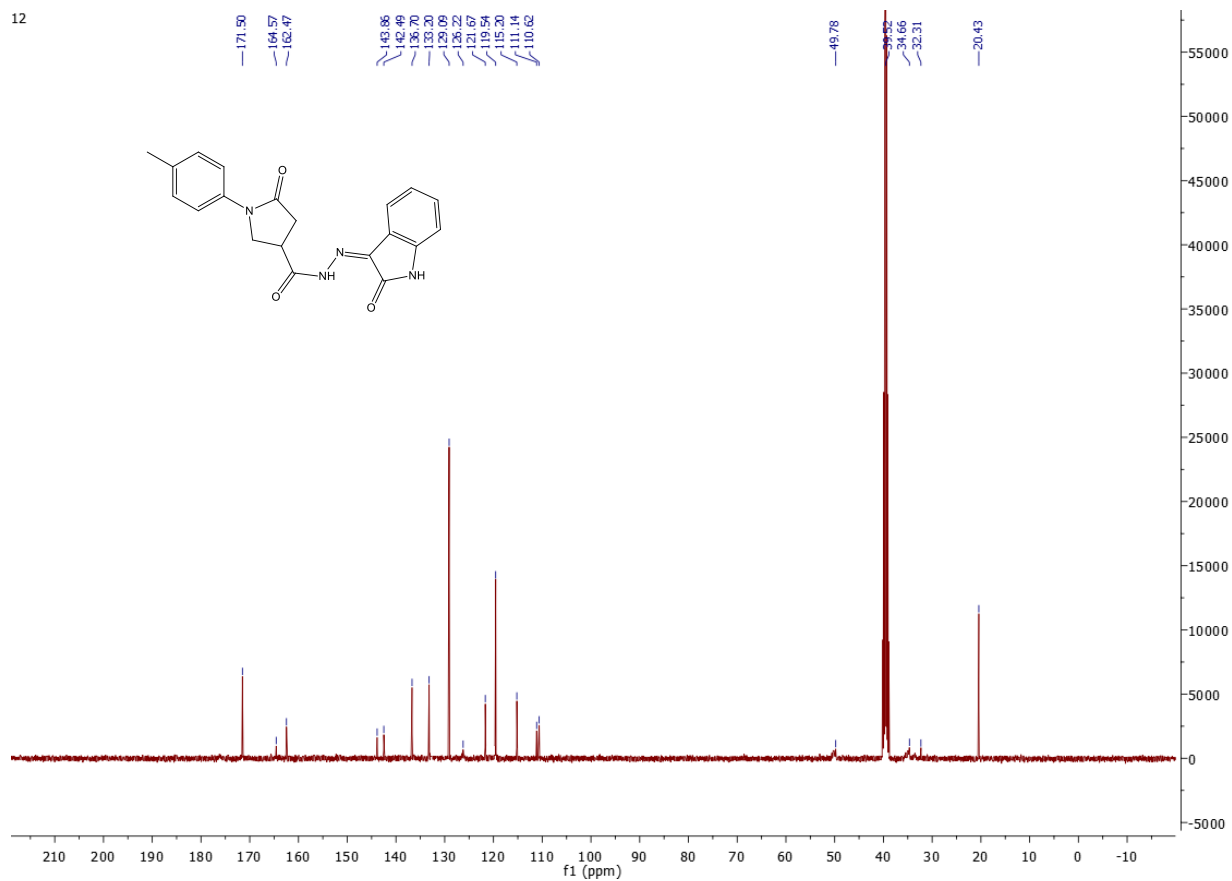

Figure S35. <sup>13</sup>C NMR (101 MHz, DMSO-*d*<sub>6</sub>) spectrum of 26

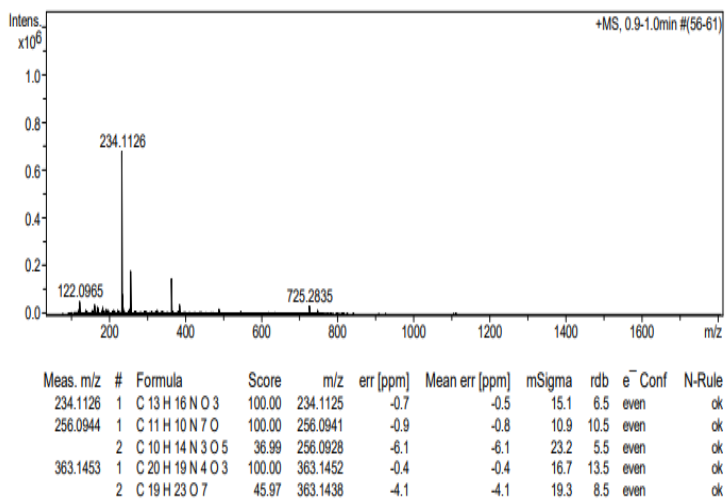

Figure S36. HRMS spectrum of 26

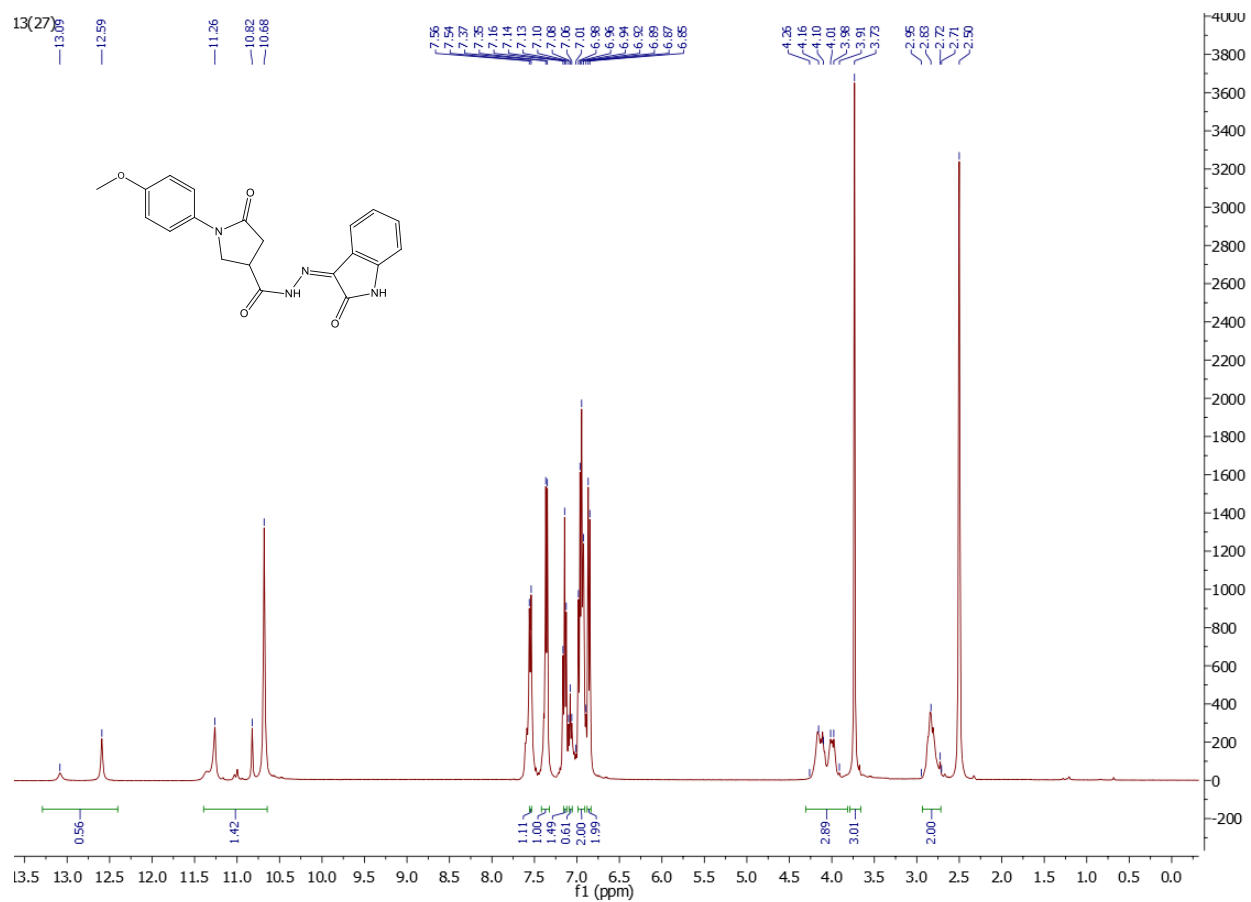

Figure S37. <sup>1</sup>H NMR (400 MHz, DMSO-*d*<sub>6</sub>) spectrum of **27**

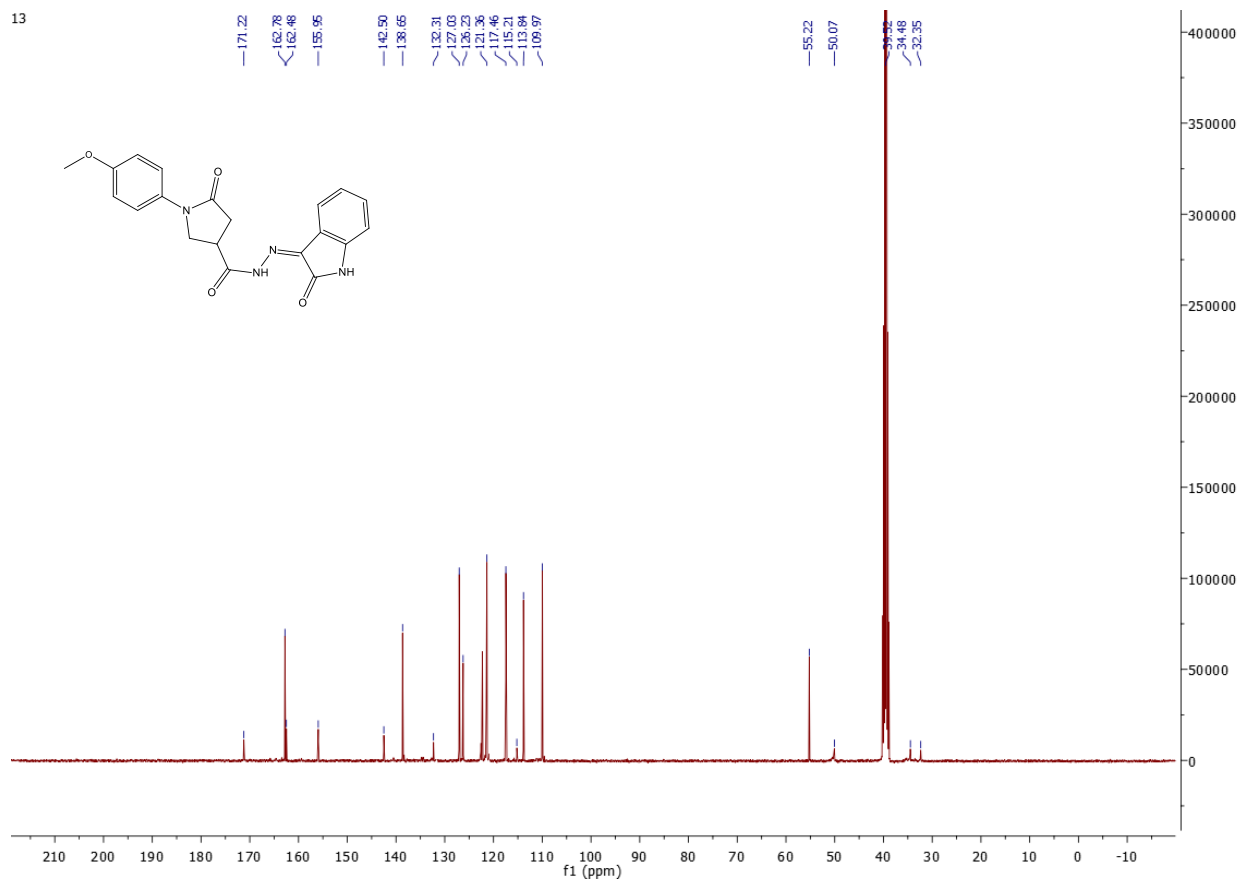

Figure S38. <sup>13</sup>C NMR (101 MHz, DMSO-*d*<sub>6</sub>) spectrum of 27

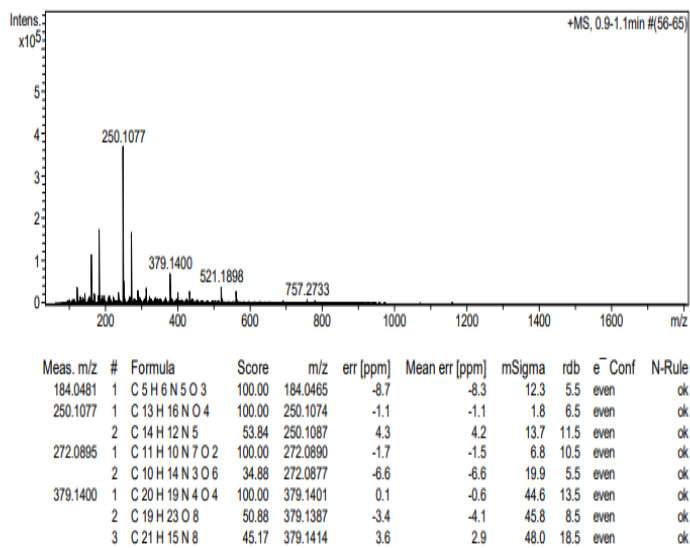

Figure S39. HRMS spectrum of 27

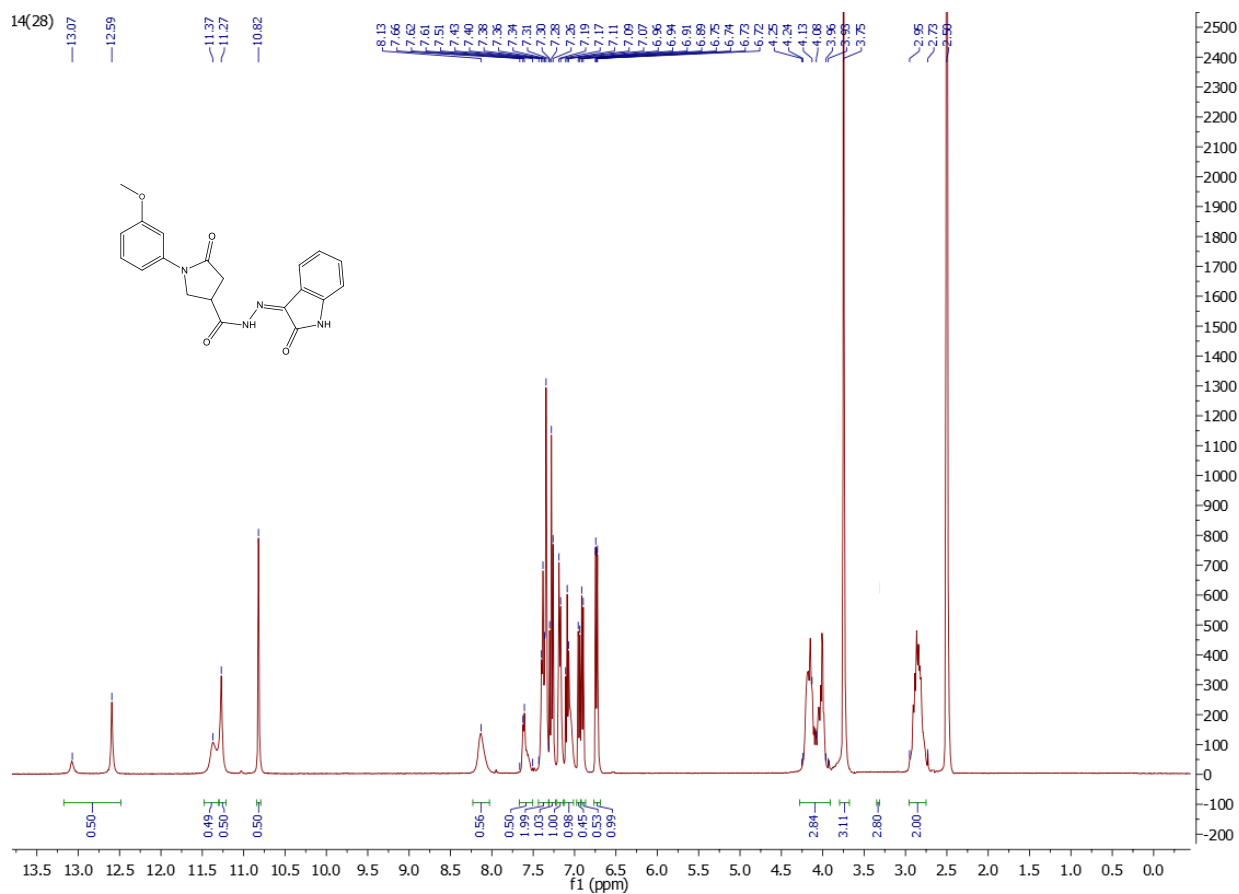

**Figure S40.**  $^1\text{H}$  NMR (400 MHz,  $\text{DMSO}-d_6$ ) spectrum of **28**

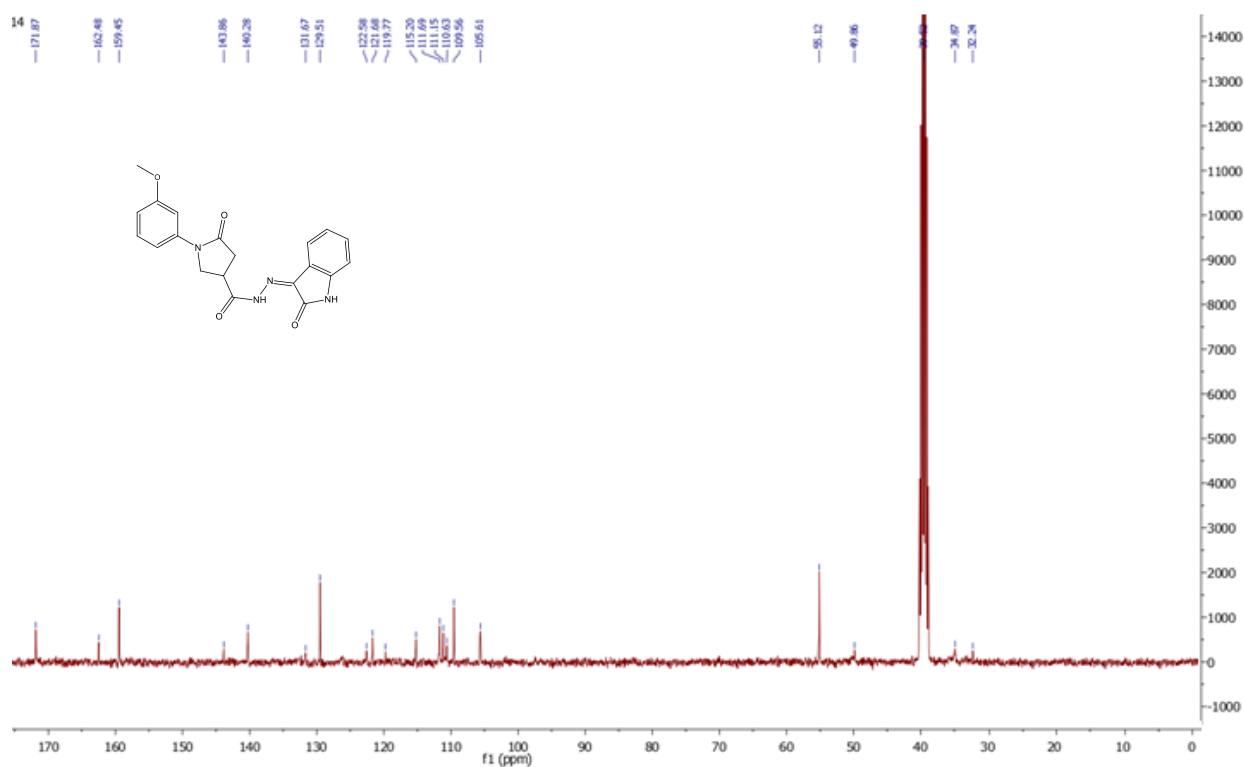

Figure S41. <sup>13</sup>C NMR (101 MHz, DMSO-*d*<sub>6</sub>) spectrum of 28

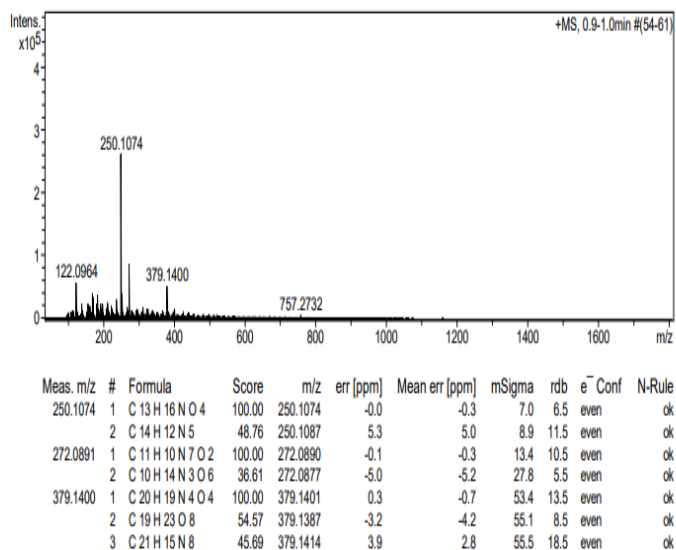

Figure S42. HRMS spectrum of 28

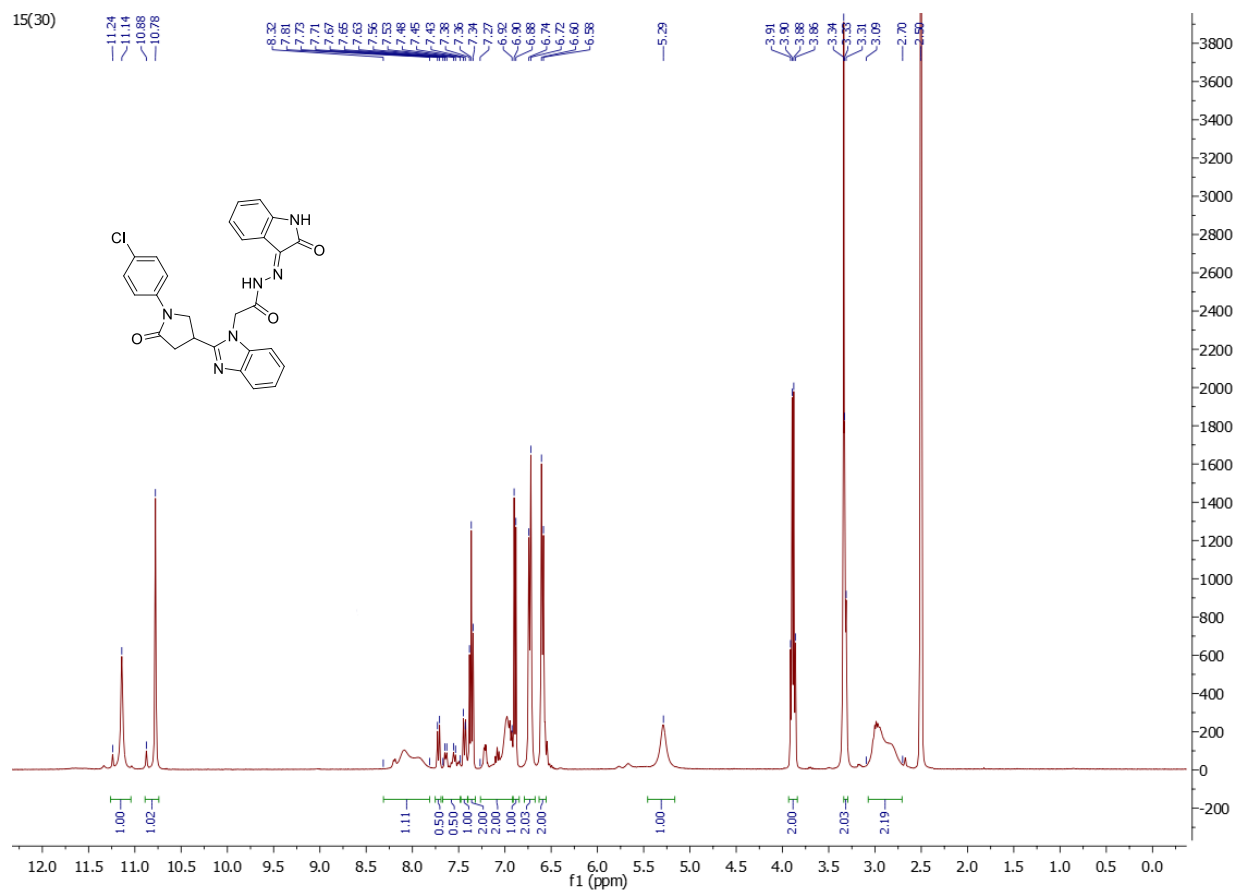

Figure S43. <sup>1</sup>H NMR (400 MHz, DMSO-*d*<sub>6</sub>) spectrum of 30



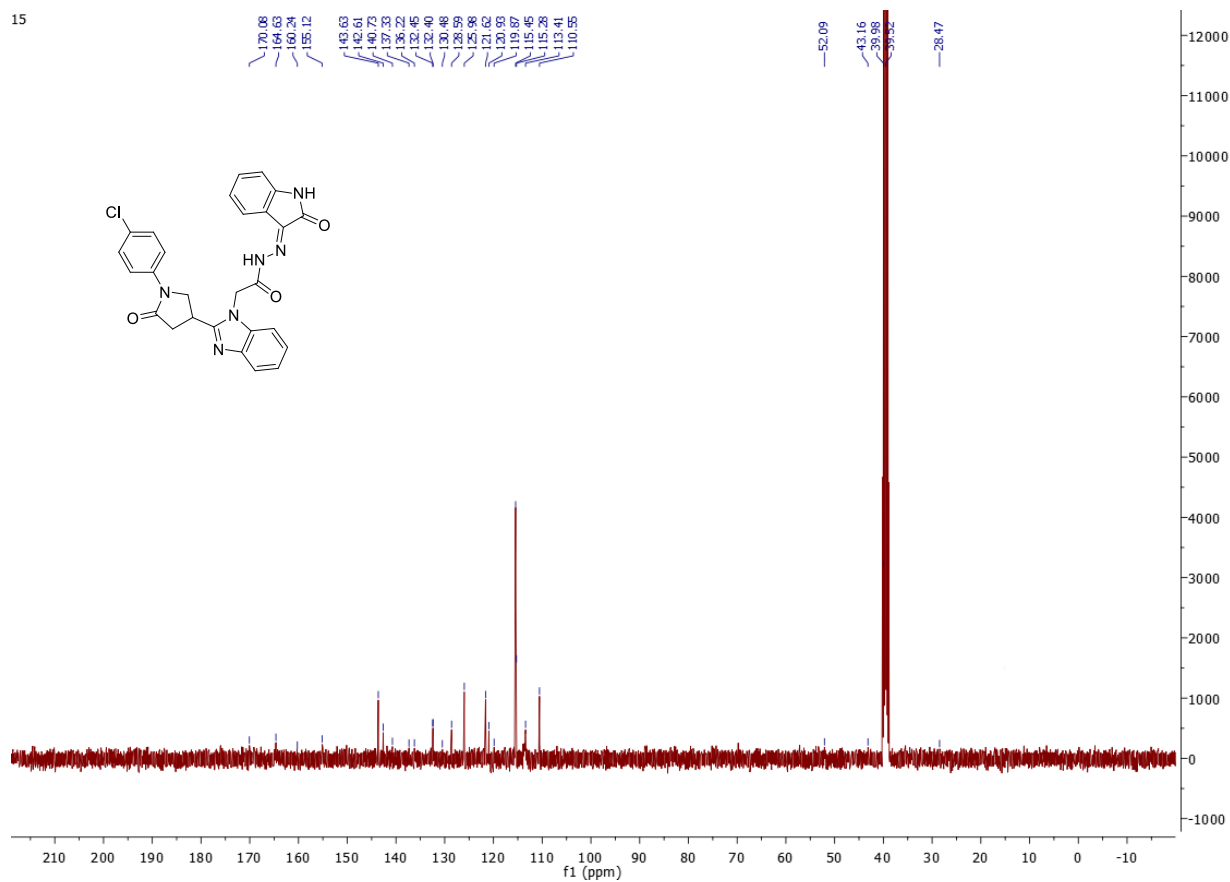

Figure S44. <sup>13</sup>C NMR (101 MHz, DMSO-*d*<sub>6</sub>) spectrum of 30

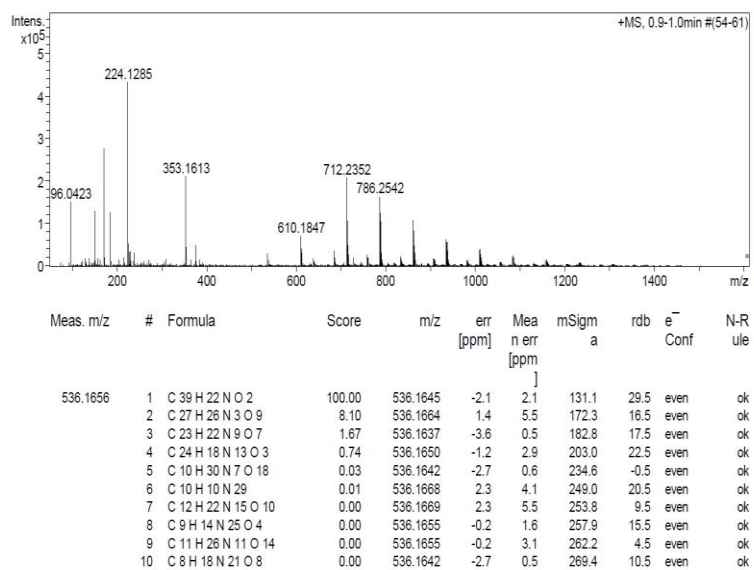

Figure S45. HRMS spectrum of 30

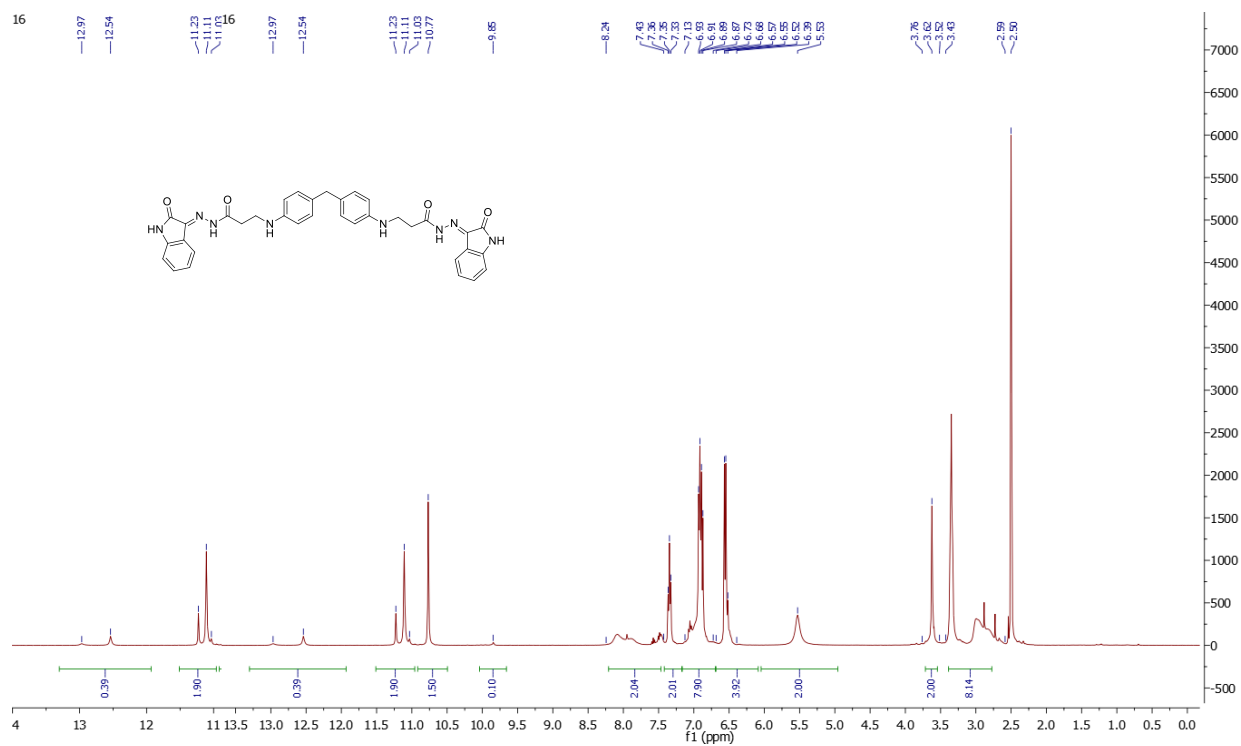

**Figure S46.** <sup>1</sup>H NMR (400 MHz, DMSO-*d*<sub>6</sub>) spectrum of **32**

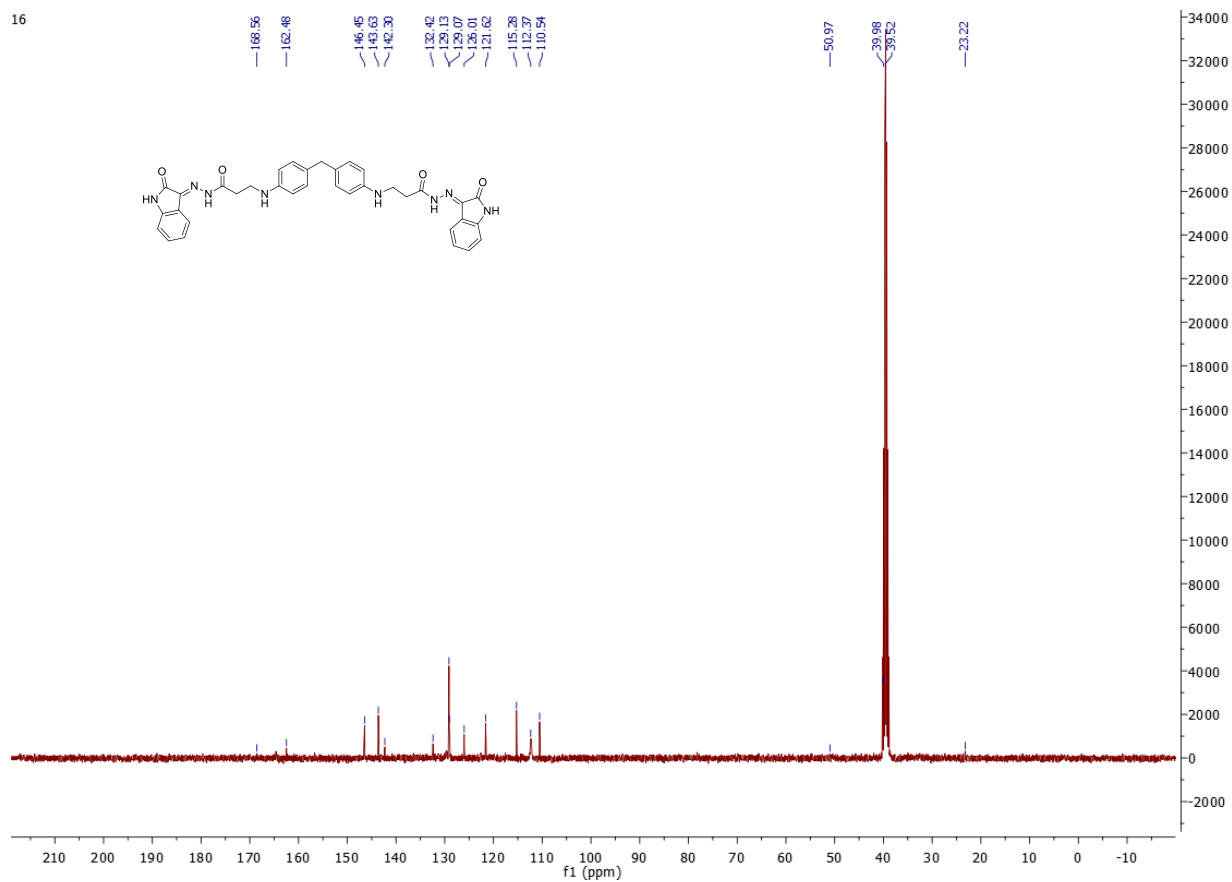

Figure S47. <sup>13</sup>C NMR (101 MHz, DMSO-*d*<sub>6</sub>) spectrum of **32**

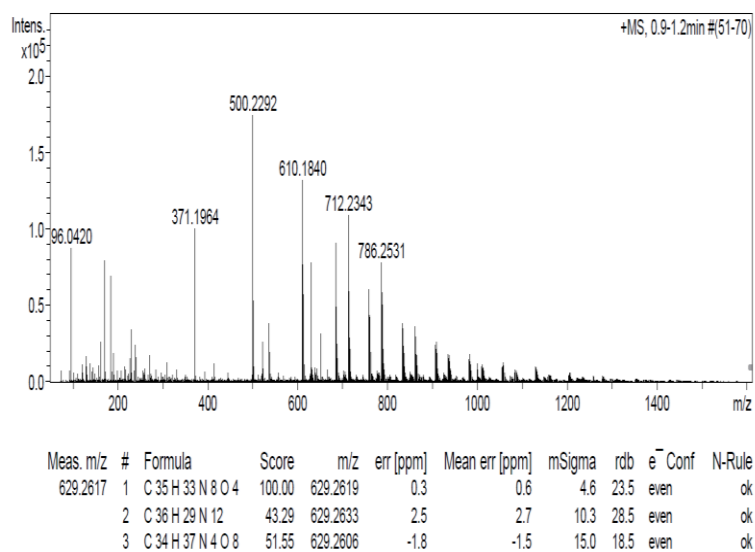

Figure S48. HRMS spectrum of **32**

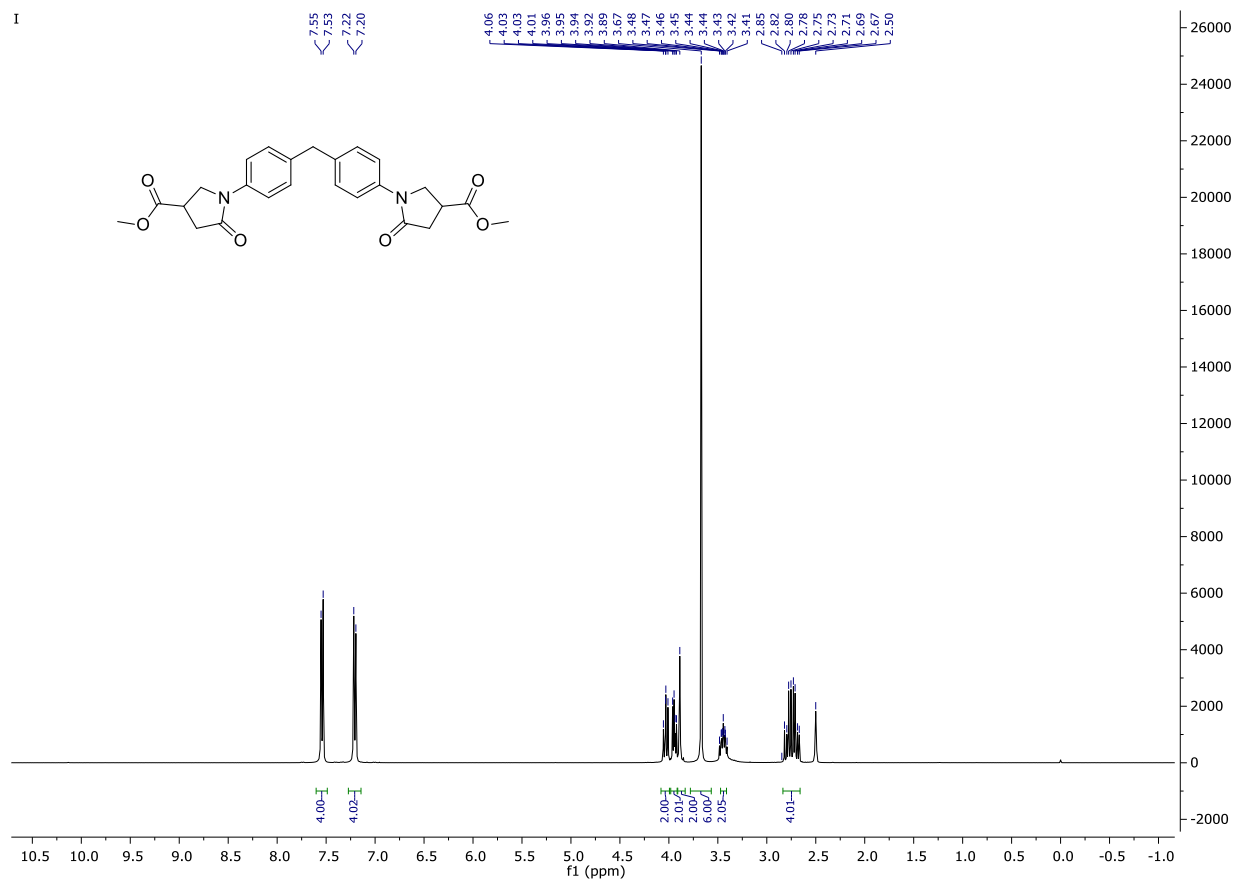

**Figure S49.** <sup>1</sup>H NMR (400 MHz, DMSO-*d*<sub>6</sub>) spectrum of 33

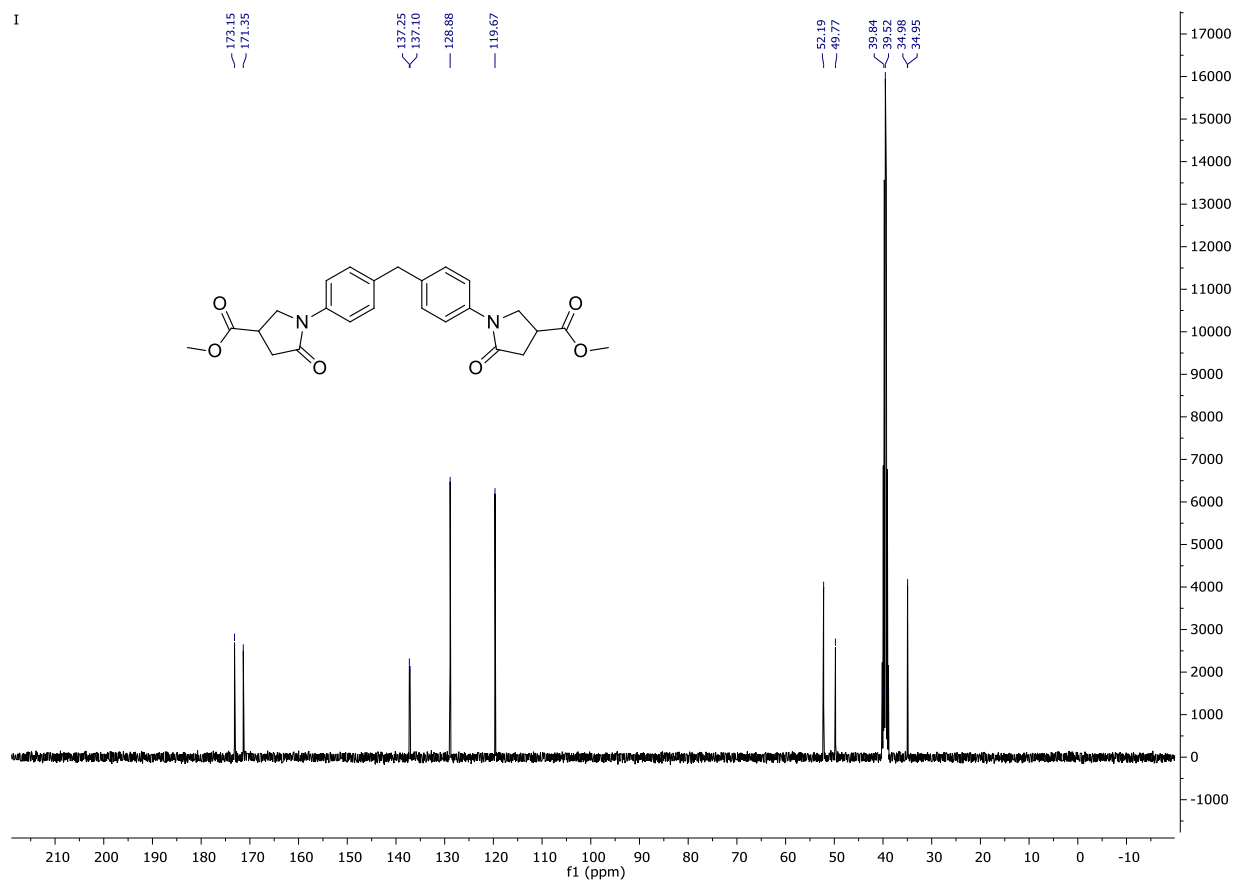

Figure S50. <sup>13</sup>C NMR (101 MHz, DMSO-*d*<sub>6</sub>) spectrum of **33**

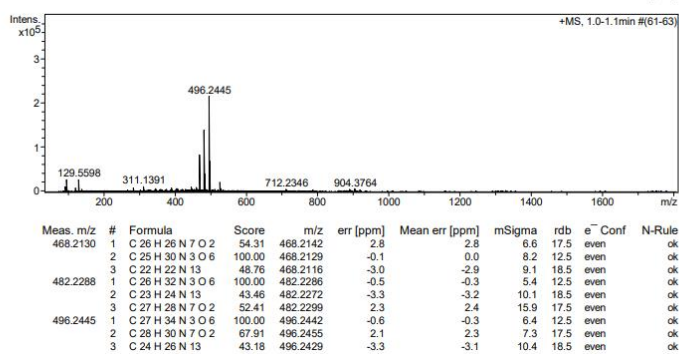

Figure S51. HRMS spectrum of **33**

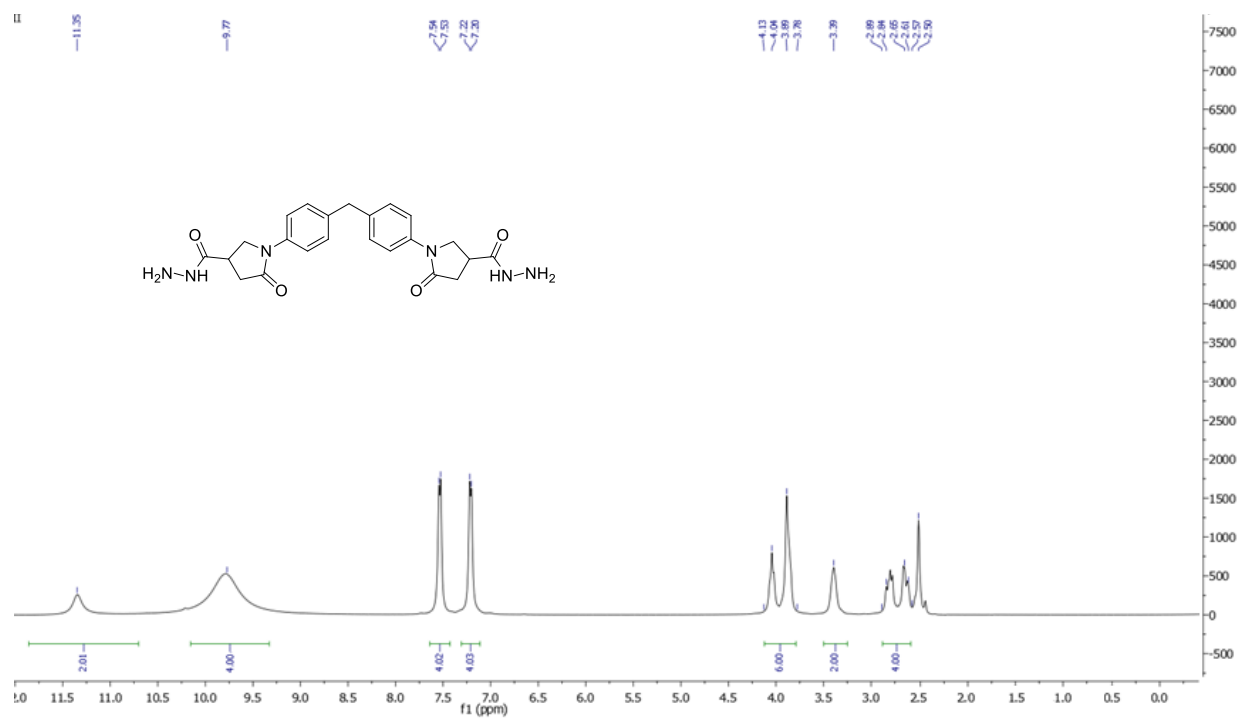

**Figure S52.** <sup>1</sup>H NMR (400 MHz, DMSO-*d*<sub>6</sub>) spectrum of **34**

II

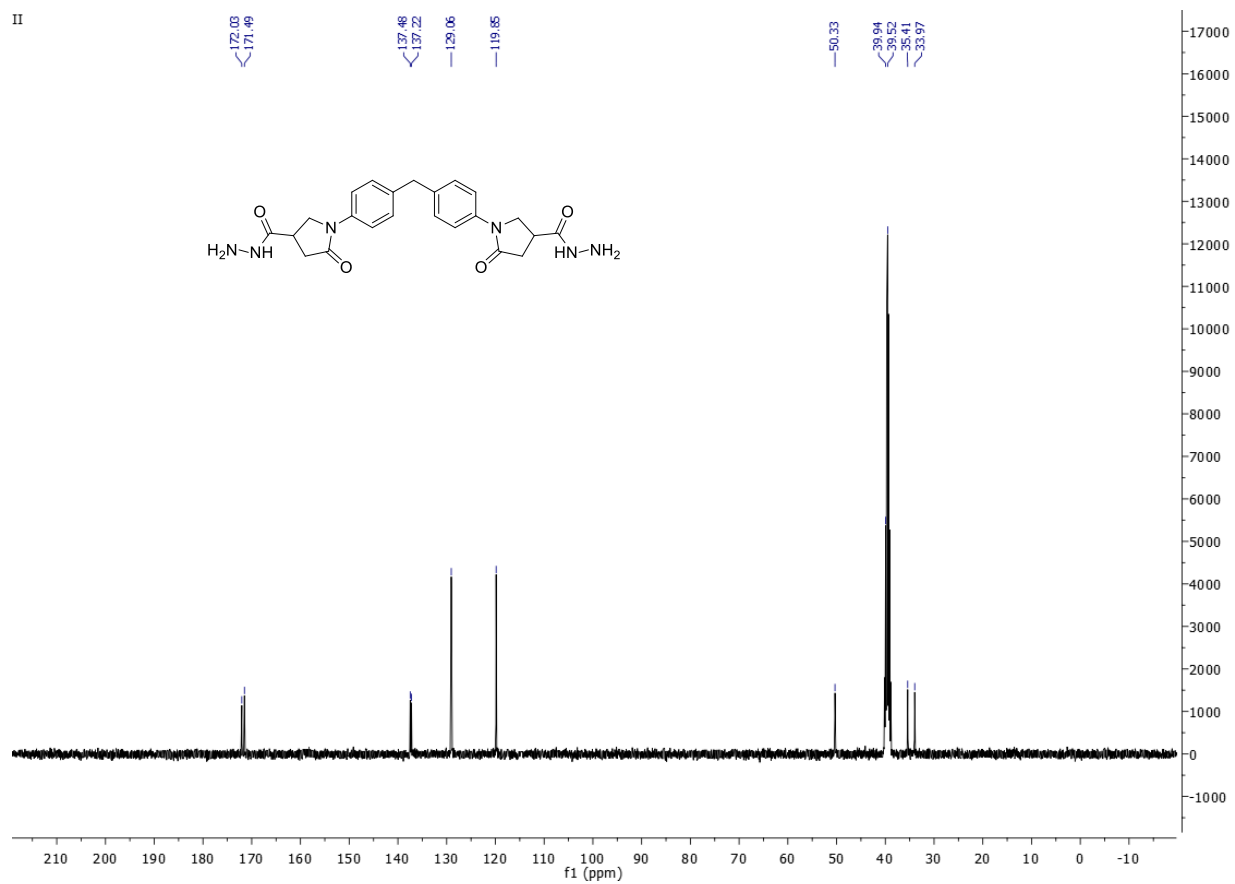

Figure S53.  $^{13}\text{C}$  NMR (101 MHz,  $\text{DMSO-d}_6$ ) spectrum of **34**

**Figure S54** .  $^1\text{H}$  NMR (400 MHz,  $\text{DMSO-}d_6$ ) spectrum of **35**



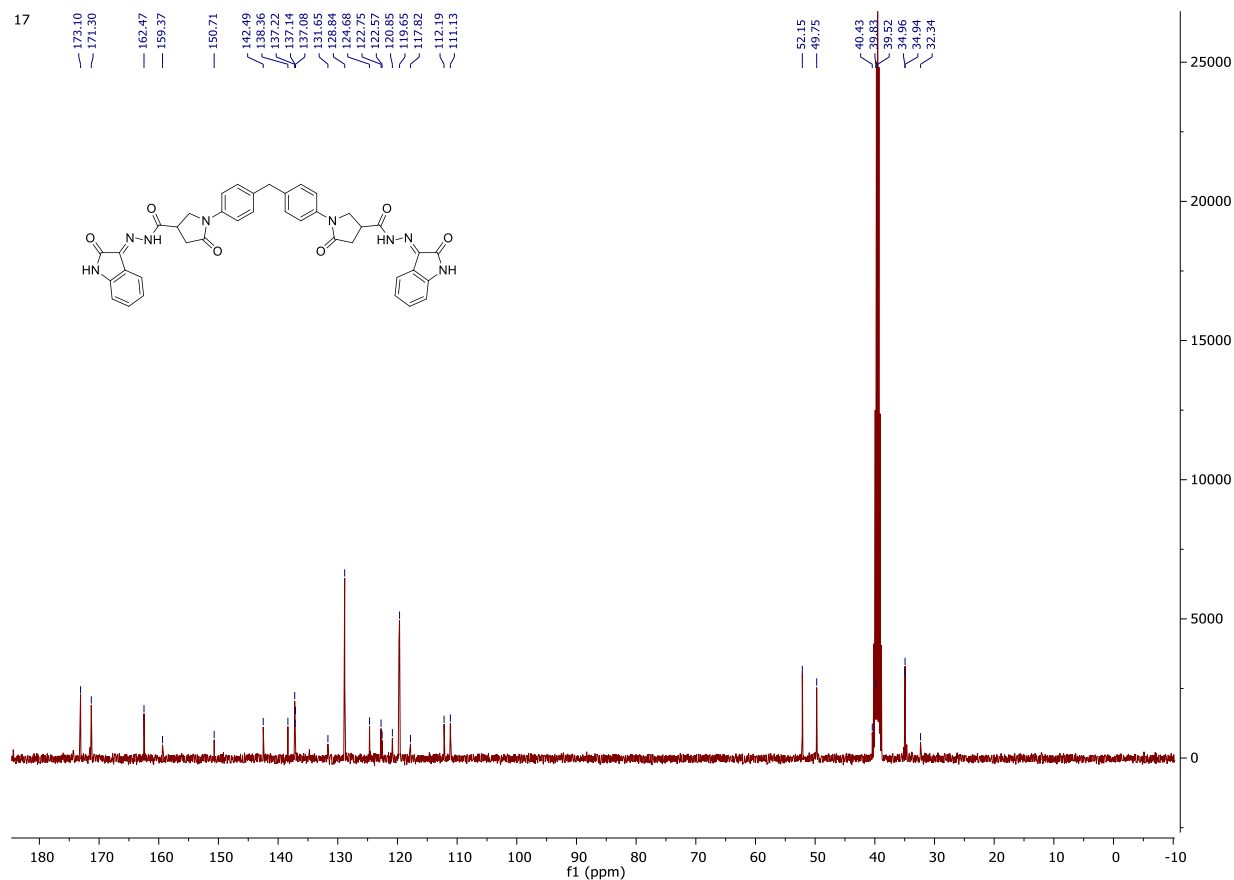

Figure S55.  $^{13}\text{C}$  NMR (101 MHz,  $\text{DMSO}-d_6$ ) spectrum of 35

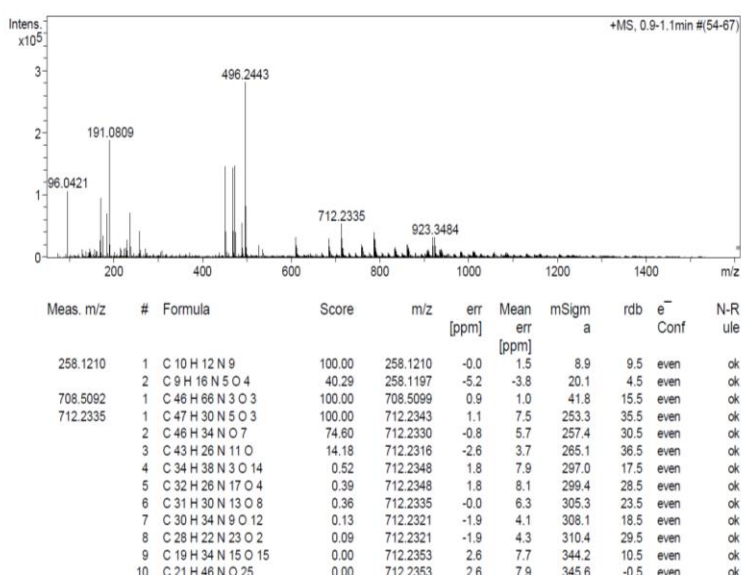

Figure S56. HRMS spectrum of 35

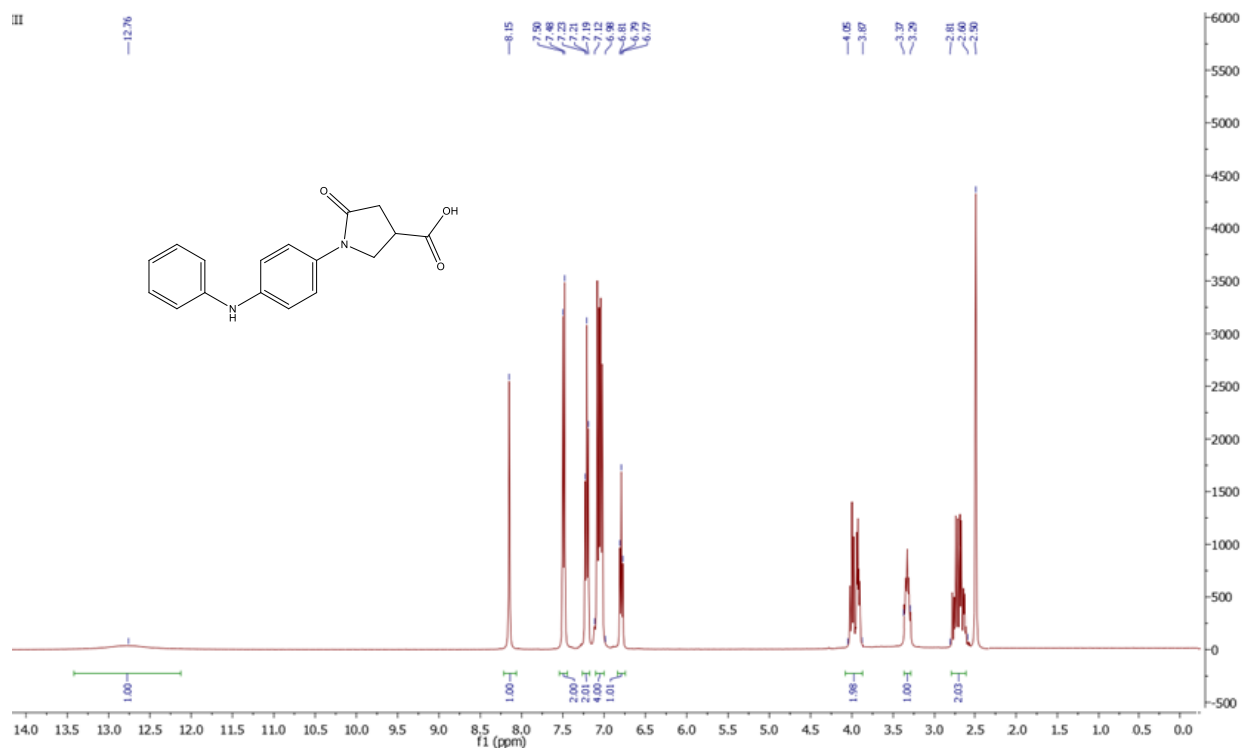

Figure S57.  $^1\text{H}$  NMR (400 MHz,  $\text{DMSO}-d_6$ ) spectrum of **36**

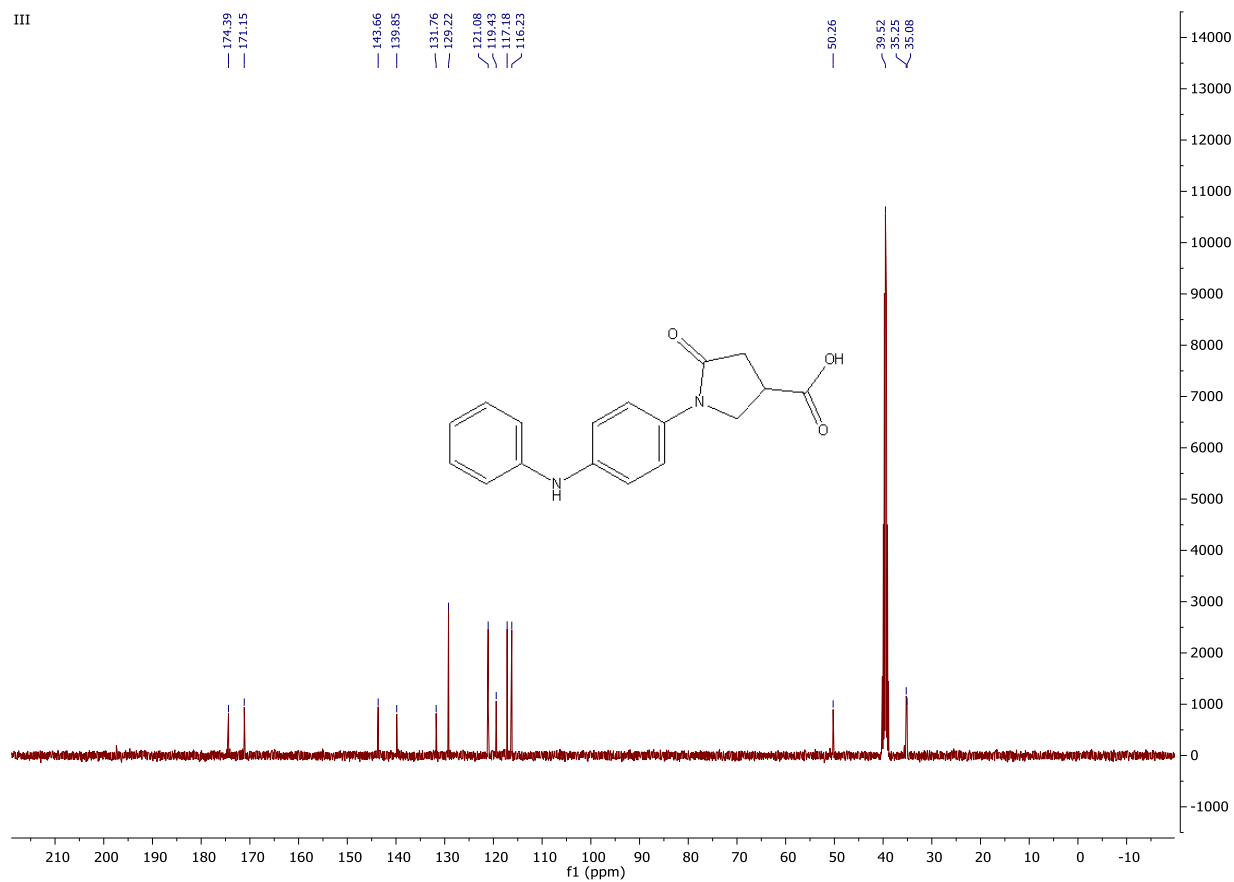

**Figure S58.**  $^{13}\text{C}$  NMR (101 MHz,  $\text{DMSO}-d_6$ ) spectrum of **36**

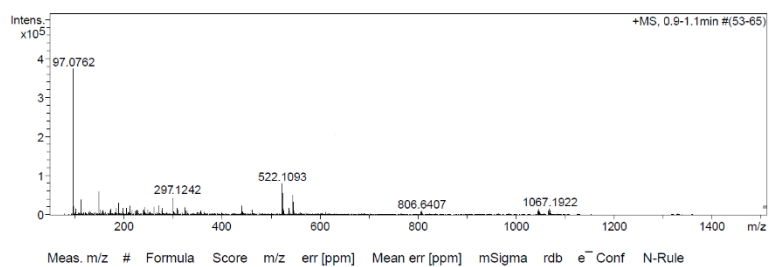

**Figure S59.** HRMS spectrum of **36**

IV

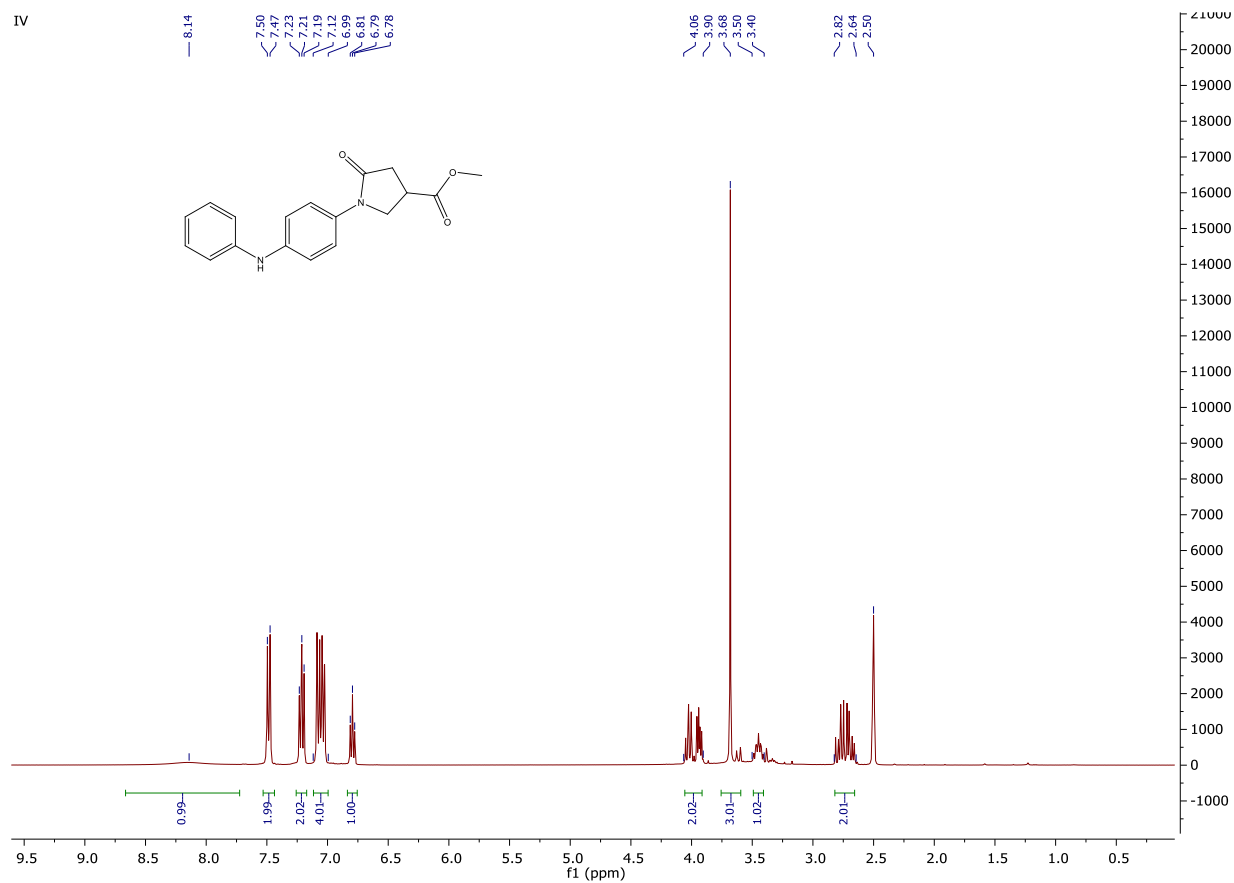

Figure S60. <sup>1</sup>H NMR (400 MHz, DMSO-*d*<sub>6</sub>) spectrum of 37

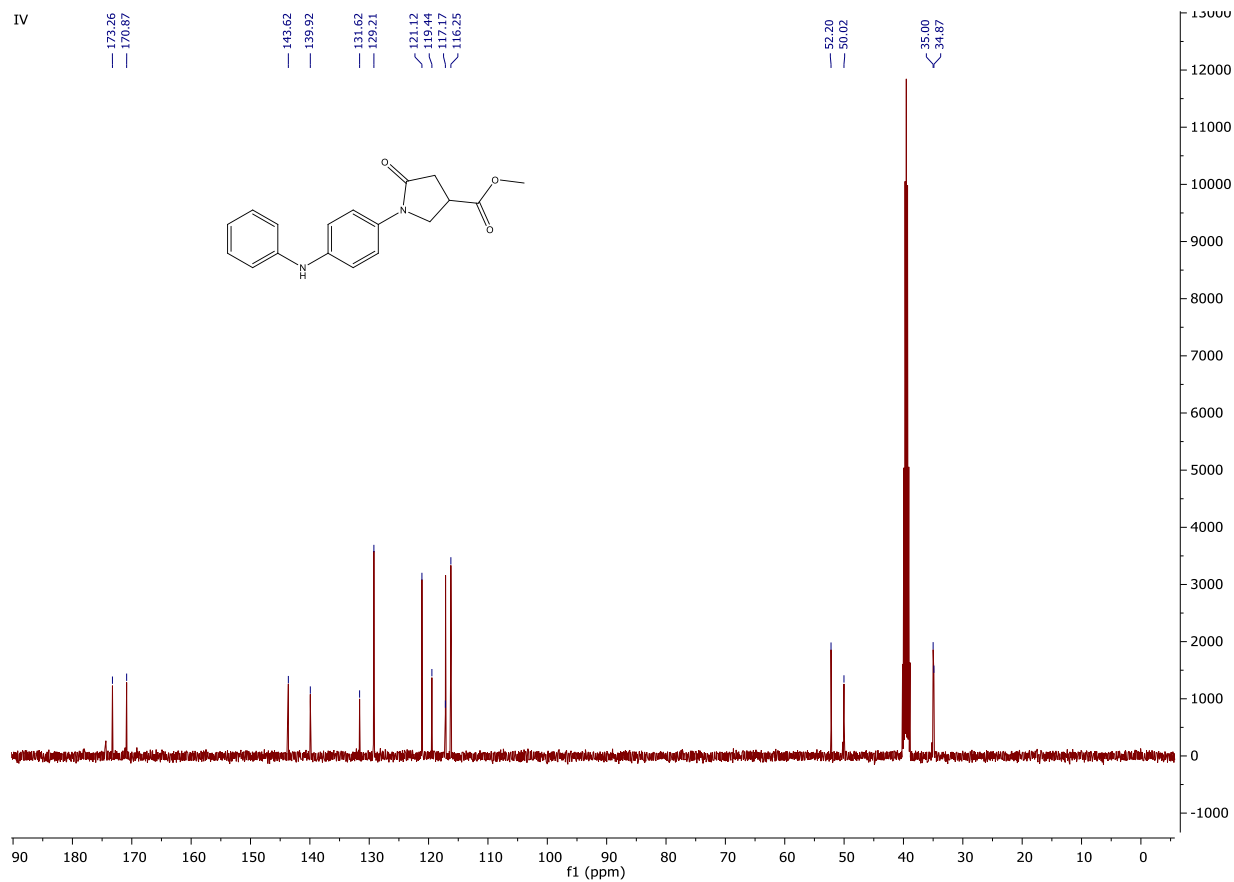

**Figure S61.** <sup>13</sup>C NMR (101 MHz, DMSO-*d*<sub>6</sub>) spectrum of **37**

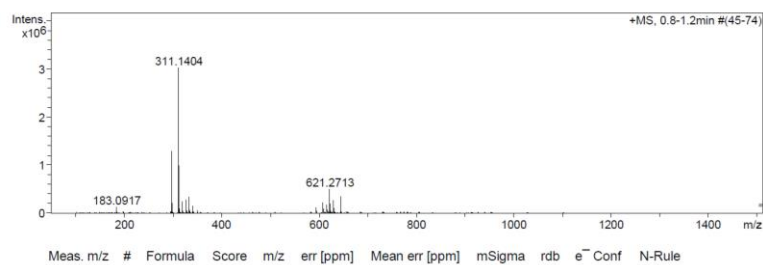

**Figure S62.** HRMS spectrum of **37**

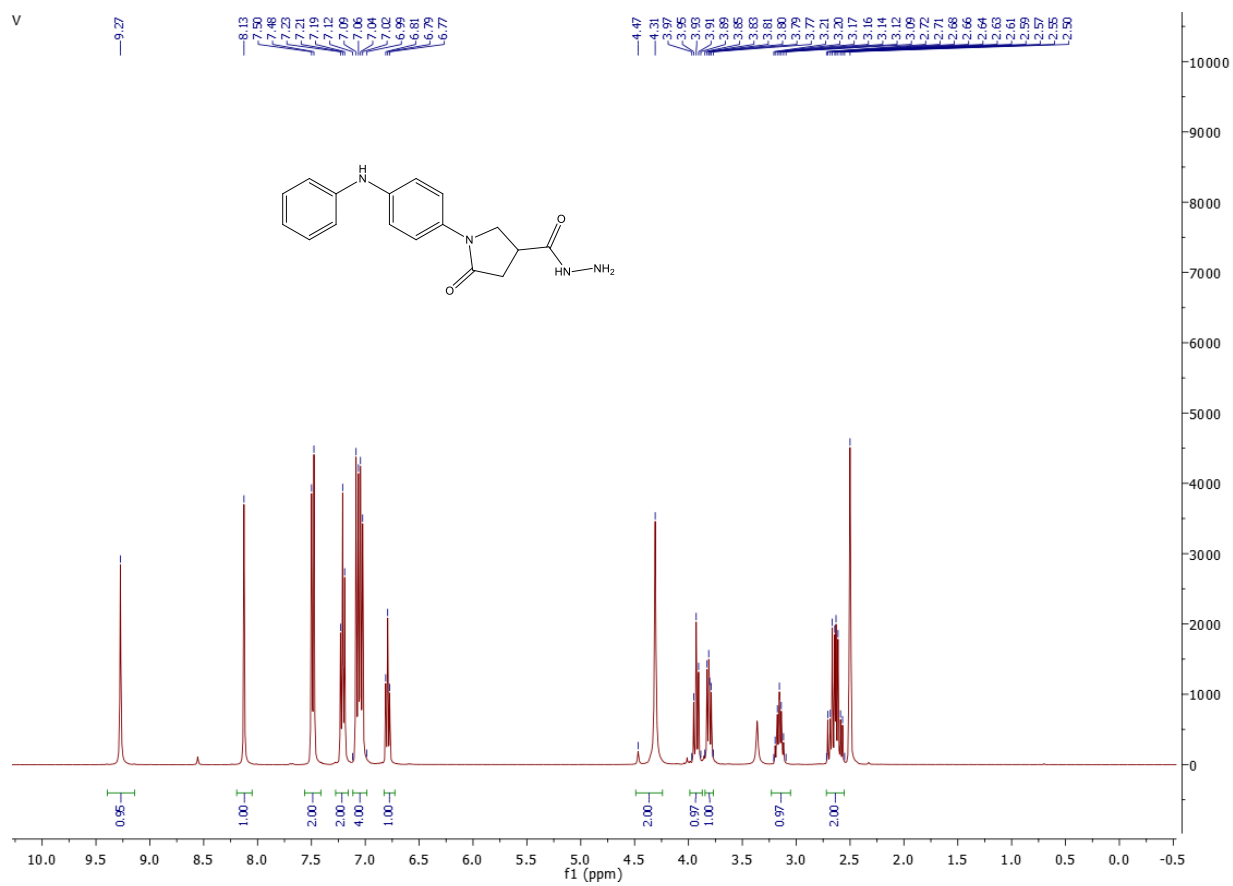

Figure S63. <sup>1</sup>H NMR (400 MHz, DMSO-*d*<sub>6</sub>) spectrum of 38

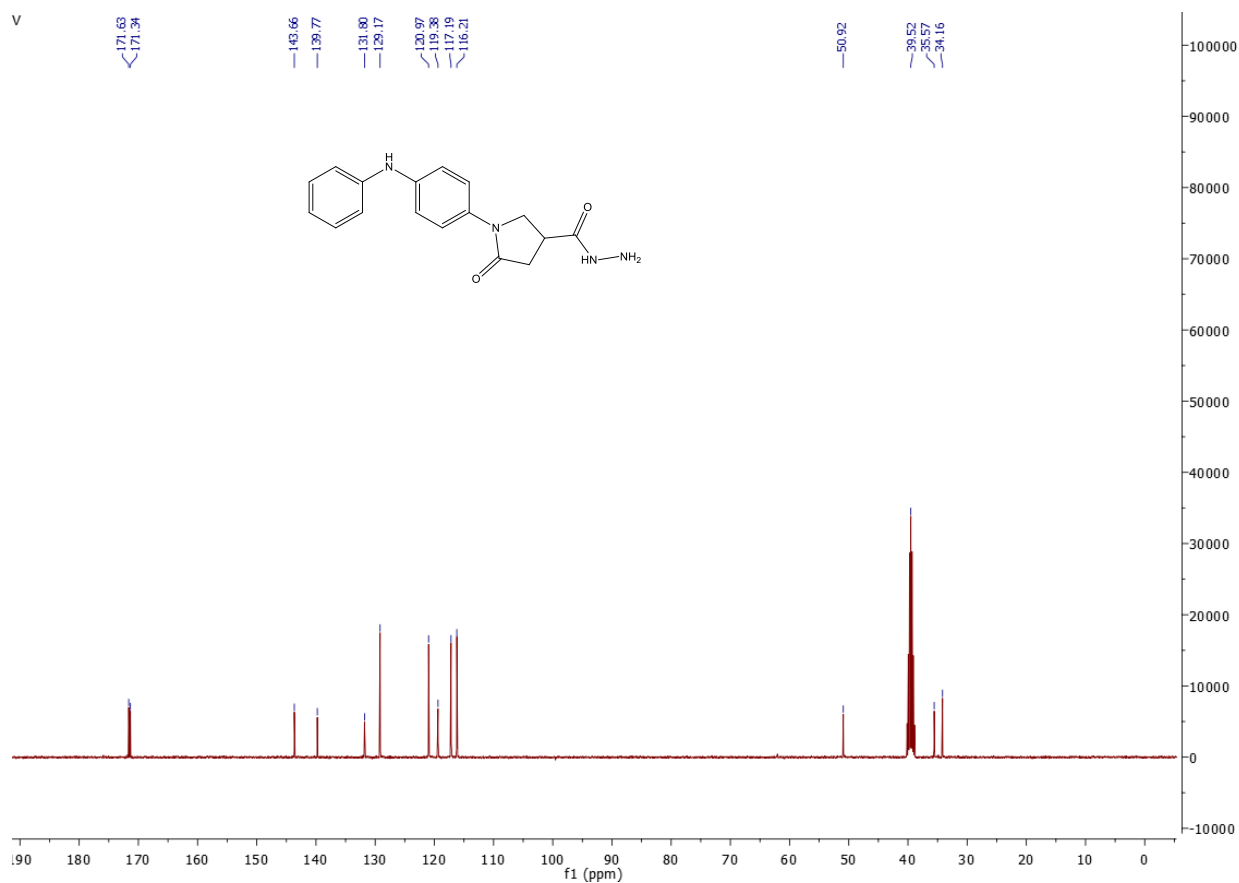

Figure S64.  $^{13}\text{C}$  NMR (101 MHz,  $\text{DMSO}-d_6$ ) spectrum of 38

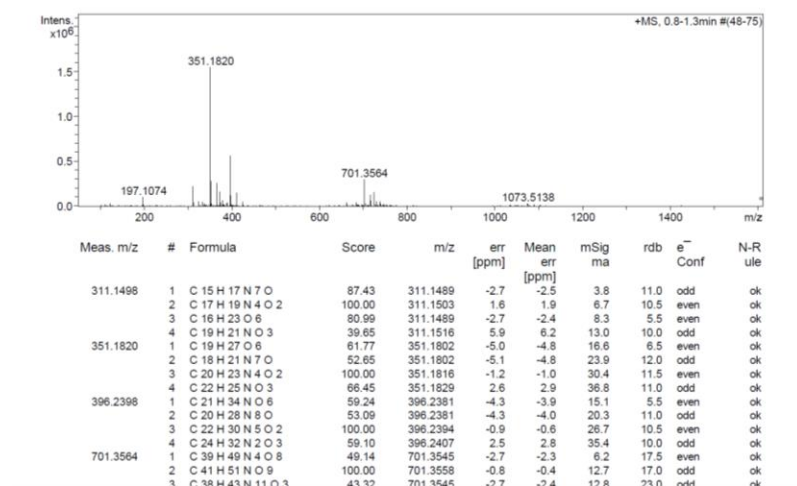

Figure S65. HRMS spectrum of 38

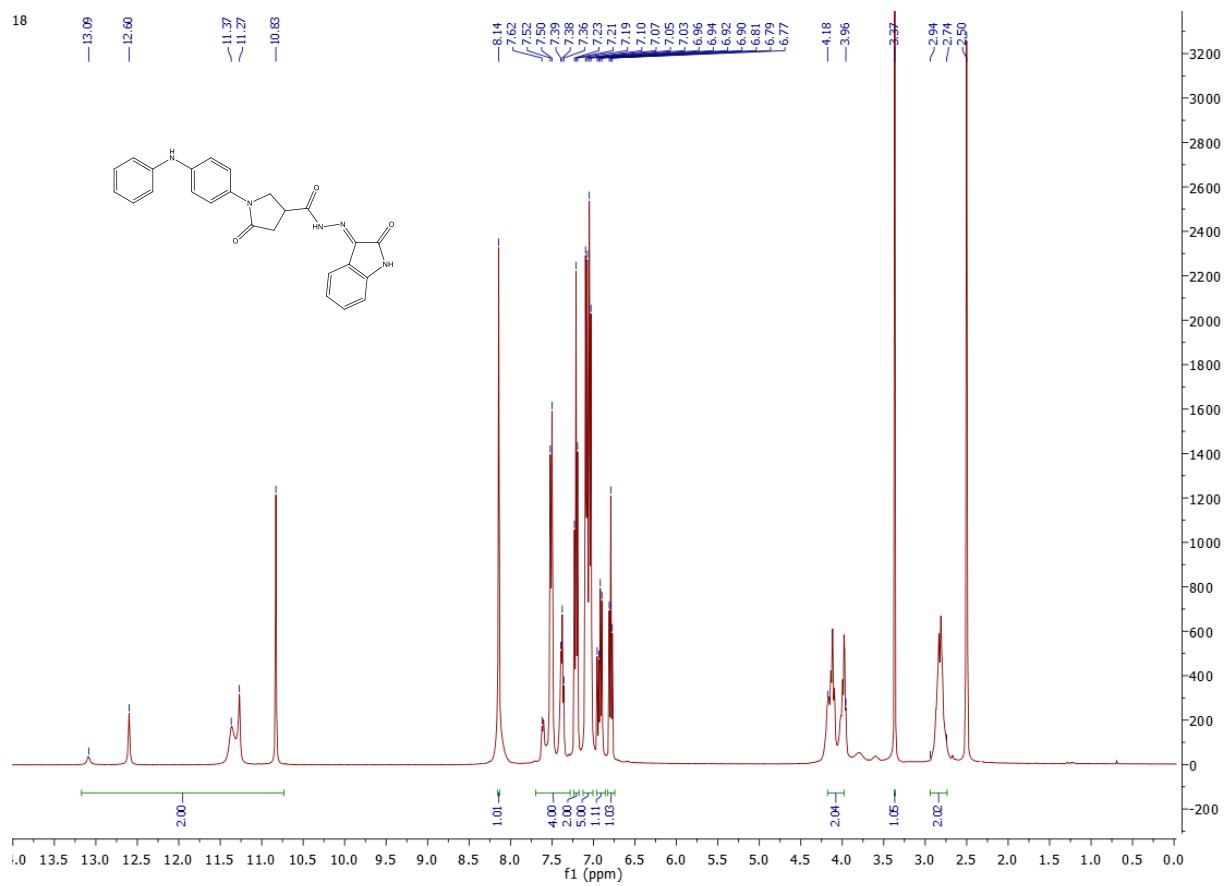



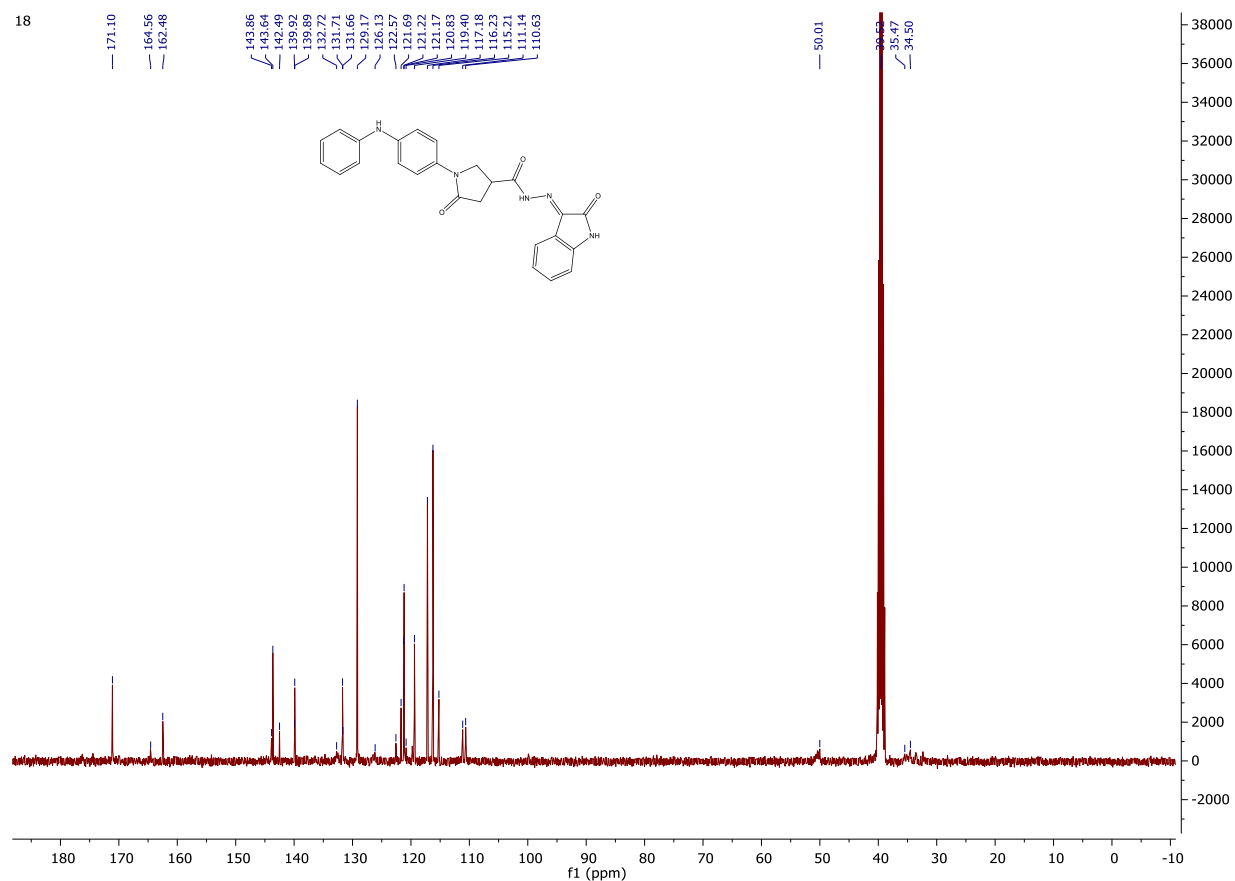Figure S67. <sup>13</sup>C NMR (400 MHz, DMSO-*d*<sub>6</sub>) spectrum of 39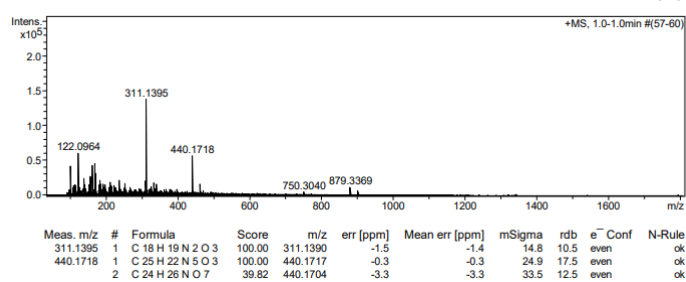

Figure S68. HRMS spectrum of 39
